# Supplementary material for: Multi-responsive luminescent sensor based on three dimensional lanthanide metal–organic framework
Source: Royal Society of Chemistry journal article supplement (doi:10.1039/c8nj04601h), 2018-01-01
Supplement: c8nj04601h1.pdf [file c8nj04601h1.pdf]

## **New Journal of Chemistry**

### **Supporting Information**

#### **Multi-responsive luminescent sensor based on three dimensional lanthanide metal–organic framework**

Yufang Tao,<sup>a</sup> Ping Zhang,<sup>a</sup> Junning Liu,<sup>b</sup> Xiaodong Chen,<sup>a</sup> Xiuli Guo,<sup>a</sup> Haoqing Jin,<sup>a</sup> Juan Chai,<sup>a</sup> Li Wang\*<sup>a</sup> and Yong Fan\*<sup>a</sup>

## Table of Contents

---

|                                                                                                                                                                                                                                                                                                                                                                                                                                                                            |     |
|----------------------------------------------------------------------------------------------------------------------------------------------------------------------------------------------------------------------------------------------------------------------------------------------------------------------------------------------------------------------------------------------------------------------------------------------------------------------------|-----|
| <b>Fig. S1</b> Powder X-ray diffraction patterns of <b>1</b> and <b>1A</b> (activated product of <b>1</b> ).                                                                                                                                                                                                                                                                                                                                                               | S5  |
| <b>Fig. S2</b> TGA curve of <b>1</b> measured in air atmosphere.                                                                                                                                                                                                                                                                                                                                                                                                           | S6  |
| <b>Fig. S3</b> IR spectra of H <sub>3</sub> L ligand and <b>1</b> .                                                                                                                                                                                                                                                                                                                                                                                                        | S7  |
| <b>Fig. S4</b> The UV-vis absorption spectra of free H <sub>3</sub> L ligand and <b>1A</b> at room temperature.                                                                                                                                                                                                                                                                                                                                                            | S8  |
| <b>Fig. S5</b> Solid-state excitation spectra of H <sub>3</sub> L ligand and <b>1A</b> at room temperature.                                                                                                                                                                                                                                                                                                                                                                | S9  |
| <b>Fig. S6</b> PXRD patterns for <b>1A</b> after sensing organic solvents and nitro explosives in aqueous solution.                                                                                                                                                                                                                                                                                                                                                        | S10 |
| <b>Fig. S7</b> PXRD patterns for <b>1A</b> after sensing pH, cations and anions in aqueous solution.                                                                                                                                                                                                                                                                                                                                                                       | S11 |
| <b>Fig. S8</b> (a) Luminescence spectra of <b>1A</b> treated with different solvents. (b) The Stern–Völmer (SV) quenching curve for <b>1A</b> in aqueous solutions of different concentrations of acetone.                                                                                                                                                                                                                                                                 | S12 |
| <b>Fig. S9</b> The fitting curve of the luminescence intensities of <b>1A</b> at different concentrations of acetone.                                                                                                                                                                                                                                                                                                                                                      | S13 |
| <b>Fig. S10</b> Stern–Völmer plot for the luminescence intensities of <b>1A</b> in aqueous solutions of different concentrations of acetone.                                                                                                                                                                                                                                                                                                                               | S14 |
| <b>Fig. S11</b> Cyclic response of <b>1A</b> for detecting acetone (luminescence intensity at 616 nm).                                                                                                                                                                                                                                                                                                                                                                     | S15 |
| <b>Fig. S12</b> The absorption spectra of different organic solvents and the excitation spectrum of <b>1A</b> .                                                                                                                                                                                                                                                                                                                                                            | S16 |
| <b>Fig. 13</b> (a) Luminescence spectra of <b>1A</b> in water treated with different metal ions ( $1 \times 10^{-2}$ mol L <sup>-1</sup> ). (b) The luminescence intensities of <b>1A</b> at 616 nm upon the addition of different metal ions followed by Fe <sup>3+</sup> ions. The blue bars represent the intensities in different metal ion aqueous solutions, the red bars represent the intensities in the mixed solutions of Fe <sup>3+</sup> and other metal ions. | S17 |
| <b>Fig. S14</b> The SV quenching curve for <b>1A</b> in aqueous solutions of different concentrations of Fe <sup>3+</sup> .                                                                                                                                                                                                                                                                                                                                                | S18 |
| <b>Fig. S15</b> The fitting curve of the luminescence intensities of <b>1A</b> at different concentrations of Fe <sup>3+</sup> .                                                                                                                                                                                                                                                                                                                                           | S19 |
| <b>Fig. S16</b> Stern–Völmer plot for the luminescence intensities of <b>1A</b> in aqueous solutions of different concentrations of Fe <sup>3+</sup> .                                                                                                                                                                                                                                                                                                                     | S20 |

---

---

|                                                                                                                                                                                                                                                                                                                                                                                                                                            |     |
|--------------------------------------------------------------------------------------------------------------------------------------------------------------------------------------------------------------------------------------------------------------------------------------------------------------------------------------------------------------------------------------------------------------------------------------------|-----|
| <b>Fig. S17</b> Cyclic response of <b>1A</b> for detecting $\text{Fe}^{3+}$ (luminescence intensity at 616 nm).                                                                                                                                                                                                                                                                                                                            | S21 |
| <b>Fig. S18</b> The absorption spectra of various cations and the excitation spectrum of <b>1A</b> .                                                                                                                                                                                                                                                                                                                                       | S22 |
| <b>Fig. S19</b> (a) Luminescence spectra of <b>1A</b> in aqueous solutions containing different concentrations of $\text{Cr}_2\text{O}_7^{2-}$ . (b) The SV quenching curve for <b>1A</b> in aqueous solutions of different concentrations of $\text{Cr}_2\text{O}_7^{2-}$ .                                                                                                                                                               | S23 |
| <b>Fig. S20</b> The fitting curve of the luminescence intensities of <b>1A</b> at different concentrations of $\text{Cr}_2\text{O}_7^{2-}$ .                                                                                                                                                                                                                                                                                               | S24 |
| <b>Fig. S21</b> Stern–Völmer plot for the luminescence intensities of <b>1A</b> in aqueous solutions of different concentrations of $\text{Cr}_2\text{O}_7^{2-}$ .                                                                                                                                                                                                                                                                         | S25 |
| <b>Fig. S22</b> Cyclic response of <b>1A</b> for detecting $\text{Cr}_2\text{O}_7^{2-}$ (luminescence intensity at 616 nm).                                                                                                                                                                                                                                                                                                                | S26 |
| <b>Fig. S23</b> The absorption spectra of various anions and the excitation spectrum of <b>1A</b> .                                                                                                                                                                                                                                                                                                                                        | S27 |
| <b>Fig. S24</b> (a) The luminescence intensities of <b>1A</b> at 616 nm upon the addition of different nitro explosives followed by 4-NP. The green bars represent the intensities in different nitro explosive aqueous solutions, the yellow bars represent the intensities in the mixed solutions of 4-NP and other nitro explosives. (b) The SV quenching curve for <b>1A</b> in aqueous solutions of different concentrations of 4-NP. | S28 |
| <b>Fig. S25</b> The fitting curve of the luminescence intensities of <b>1A</b> at different concentrations of 4-NP.                                                                                                                                                                                                                                                                                                                        | S29 |
| <b>Fig. S26</b> Stern–Völmer plot for the luminescence intensities of <b>1A</b> in aqueous solutions of different concentrations of 4-NP.                                                                                                                                                                                                                                                                                                  | S30 |
| <b>Fig. S27</b> Cyclic response of <b>1A</b> for detecting 4-NP (luminescence intensity at 616 nm).                                                                                                                                                                                                                                                                                                                                        | S31 |
| <b>Fig. S28</b> The absorption spectra of different nitro explosives and the excitation spectrum of <b>1A</b> .                                                                                                                                                                                                                                                                                                                            | S32 |
| <b>Fig. S29</b> The powder X-ray diffractions of <b>1A</b> after cyclic sensing acetone, $\text{Fe}^{3+}$ , $\text{Cr}_2\text{O}_7^{2-}$ and 4-NP in aqueous solutions.                                                                                                                                                                                                                                                                    | S33 |
| <b>Fig. S30</b> Luminescence decay profiles for <b>1A</b> , acetone@ <b>1A</b> , $\text{Fe}^{3+}$ @ <b>1A</b> , $\text{Cr}_2\text{O}_7^{2-}$ @ <b>1A</b> and 4-NP@ <b>1A</b> recorded at room temperature.                                                                                                                                                                                                                                 | S34 |

---

---

|                                                                                                                                                                                          |     |
|------------------------------------------------------------------------------------------------------------------------------------------------------------------------------------------|-----|
| <b>Fig. S31</b> SEM image of <b>1A</b> after grinding.                                                                                                                                   | S36 |
| <b>Fig. S32</b> Variation of luminescence intensity of <b>1A</b> with immersion time in various analyte solutions.                                                                       | S37 |
| <b>Table S1</b> Luminescence lifetimes of <b>1A</b> , acetone@ <b>1A</b> , Fe <sup>3+</sup> @ <b>1A</b> , Cr <sub>2</sub> O <sub>7</sub> <sup>2-</sup> @ <b>1A</b> and 4-NP@ <b>1A</b> . | S38 |
| <b>Table S2</b> Crystal data and structure refinement for <b>1</b> .                                                                                                                     | S39 |
| <b>Table S3</b> Selected bond lengths [Å] and angles [°] for <b>1</b> .                                                                                                                  | S41 |
| <b>Table S4</b> The comparison of $K_{SV}$ between <b>1A</b> and other reported luminescent sensors for the detection of acetone.                                                        | S42 |
| <b>Table S5</b> The comparison of $K_{SV}$ between <b>1A</b> and other reported luminescent sensors for the detection of Fe <sup>3+</sup> .                                              | S43 |
| <b>Table S6</b> The comparison of $K_{SV}$ between <b>1A</b> and other reported luminescent sensors for the detection of Cr <sub>2</sub> O <sub>7</sub> <sup>2-</sup> .                  | S44 |
| <b>Table S7</b> The comparison of $K_{SV}$ between <b>1A</b> and other reported luminescent sensors for the detection of 4-NP.                                                           | S45 |

---

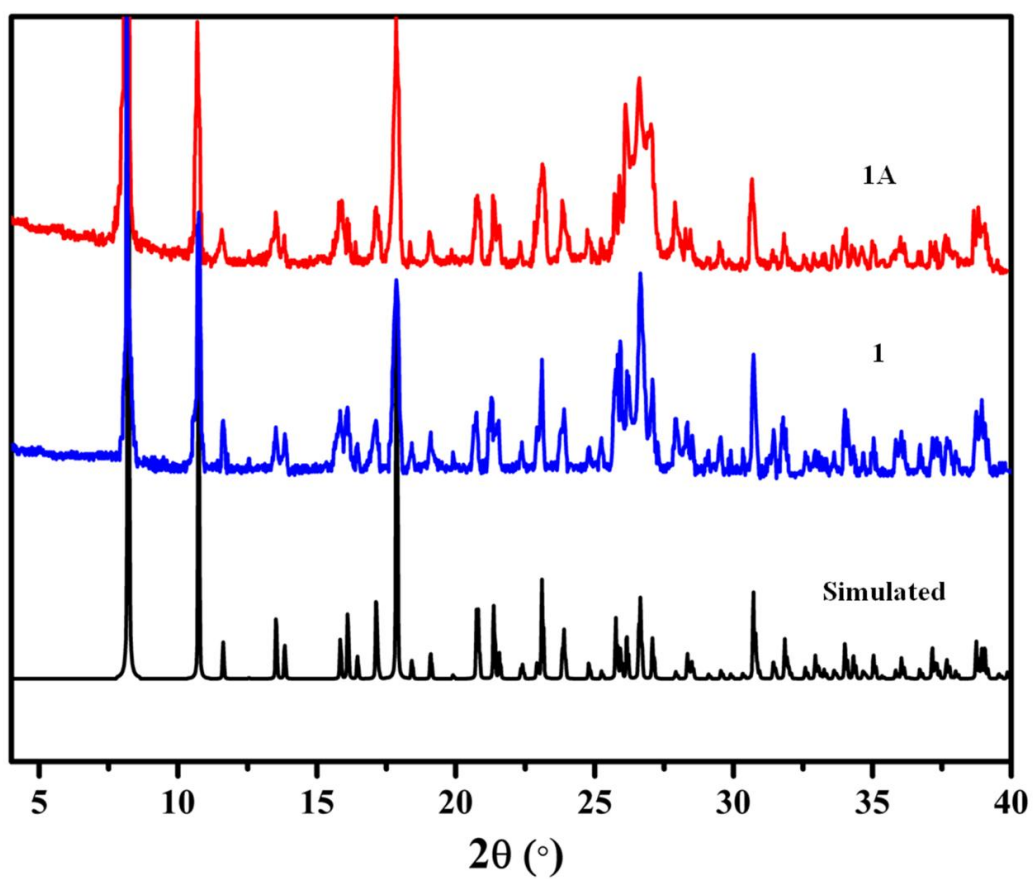

**Fig. S1** Powder X-ray diffraction patterns of **1** and **1A** (activated product of **1**).

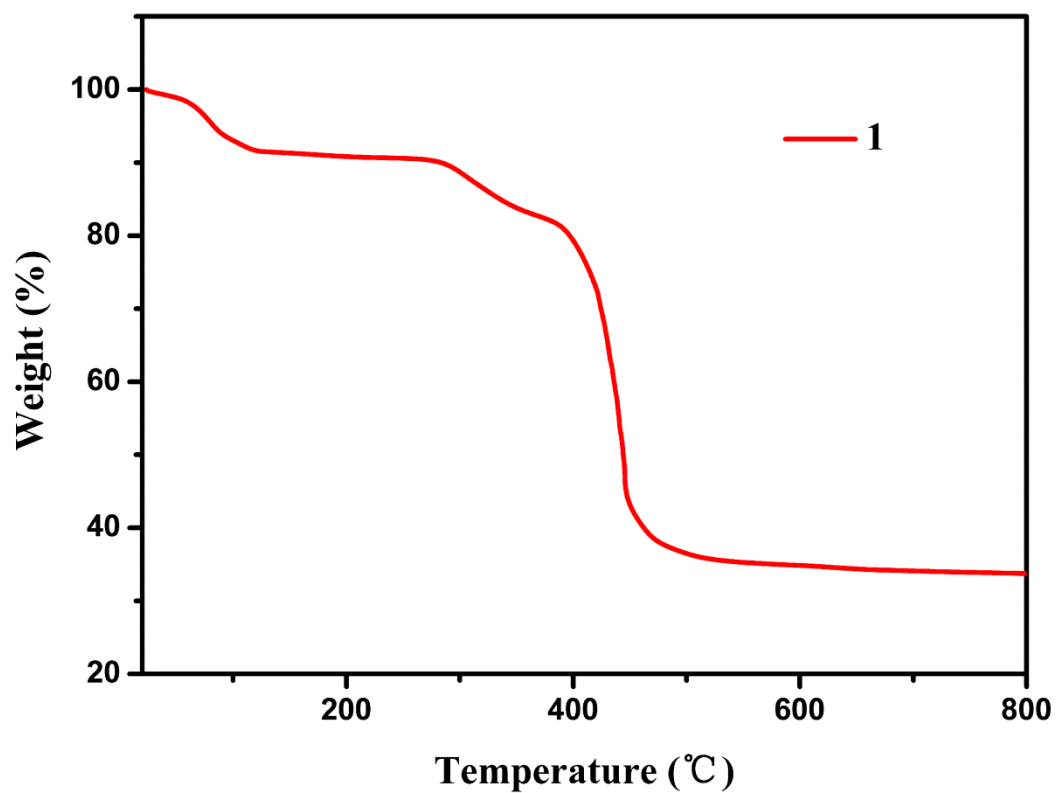

**Fig. S2** TGA curve of **1** measured in air atmosphere.

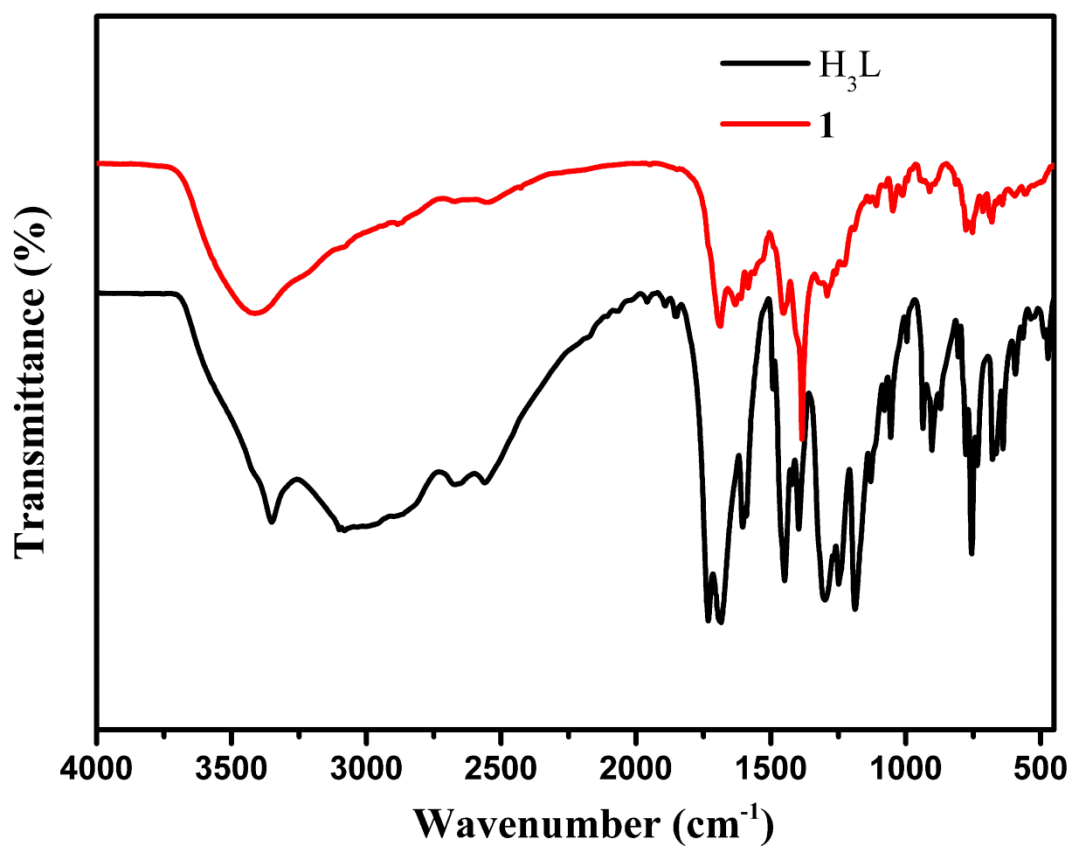

**Fig. S3** IR spectra of H<sub>3</sub>L ligand and **1**.

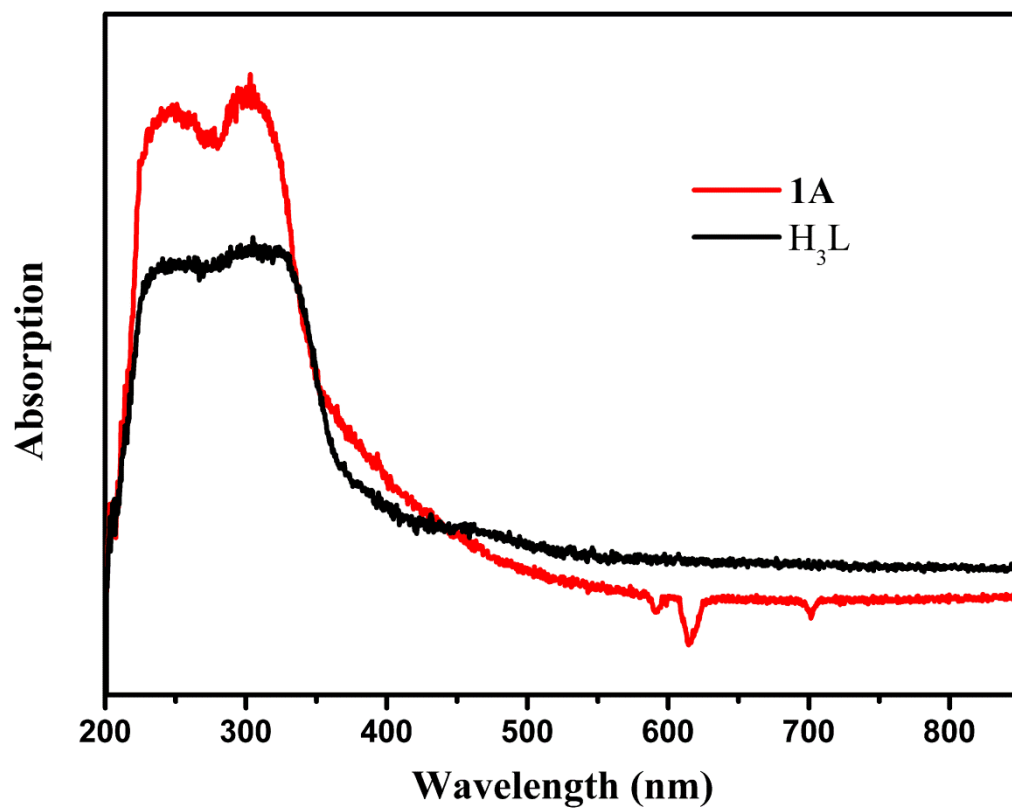

**Fig. S4** The UV-vis absorption spectra of free H<sub>3</sub>L ligand and **1A** at room temperature.



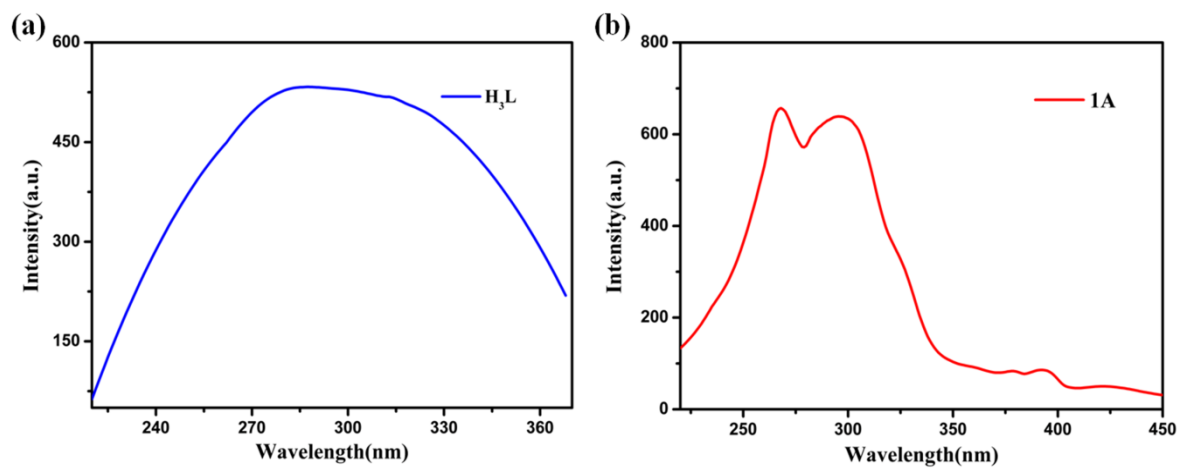

**Fig. S5** Solid-state excitation spectra of H<sub>3</sub>L ligand and **1A** at room temperature.

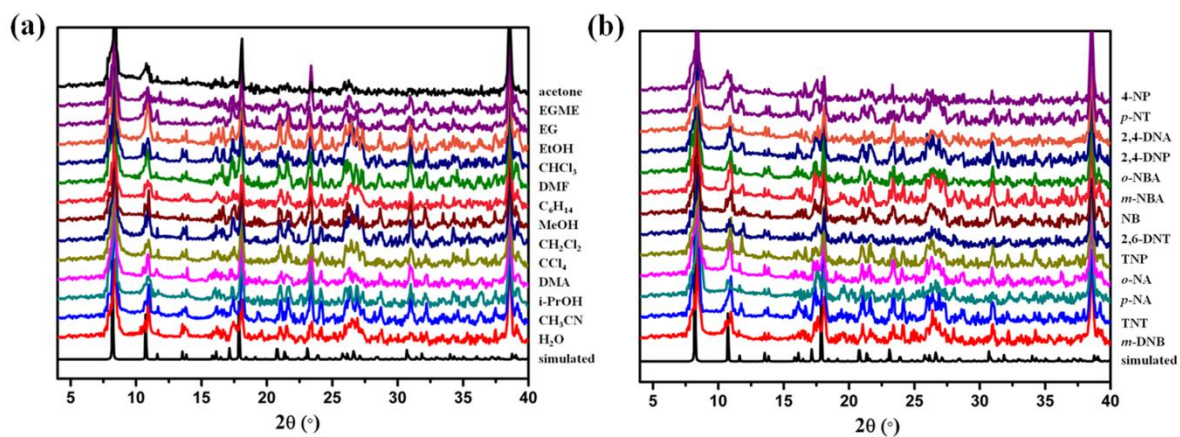

**Fig. S6** The powder X-ray diffractions of **1A** after sensing organic solvents (a) and nitro explosives (b).

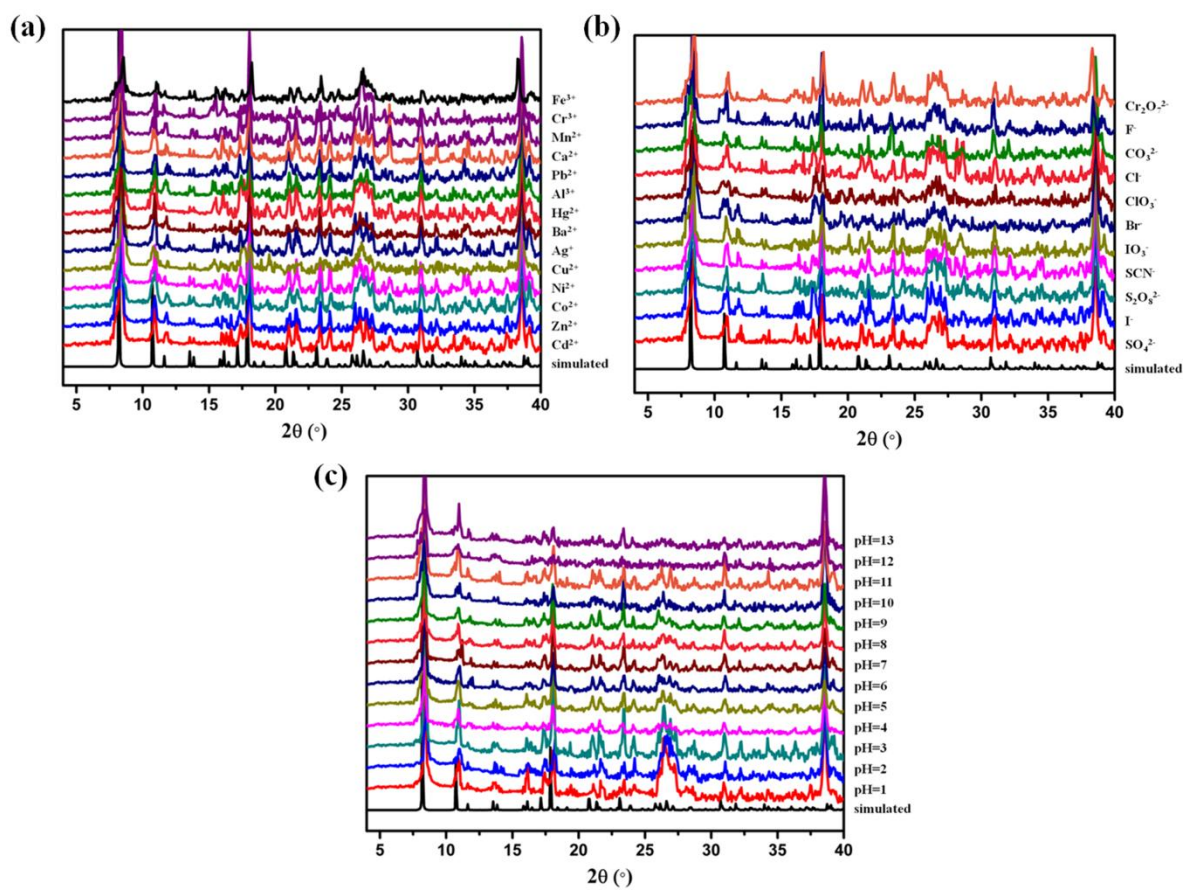

**Fig. S7** The powder X-ray diffractions of **1A** after sensing cations (a), anions (b) and pH (c) in aqueous solution.

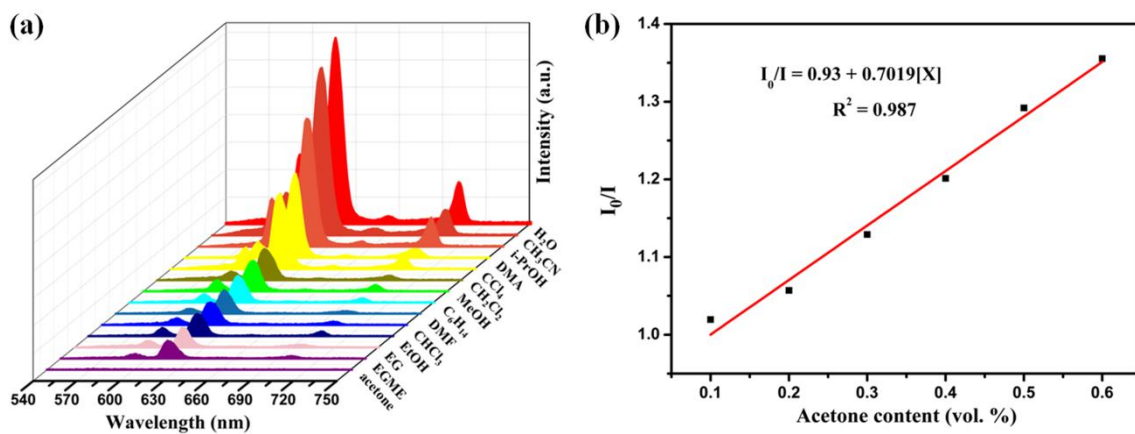

**Fig. S8** (a) Luminescence spectra of **1A** treated with different solvents. (b) The Stern–Völmer (SV) quenching curve for **1A** in aqueous solutions of different concentrations of acetone.

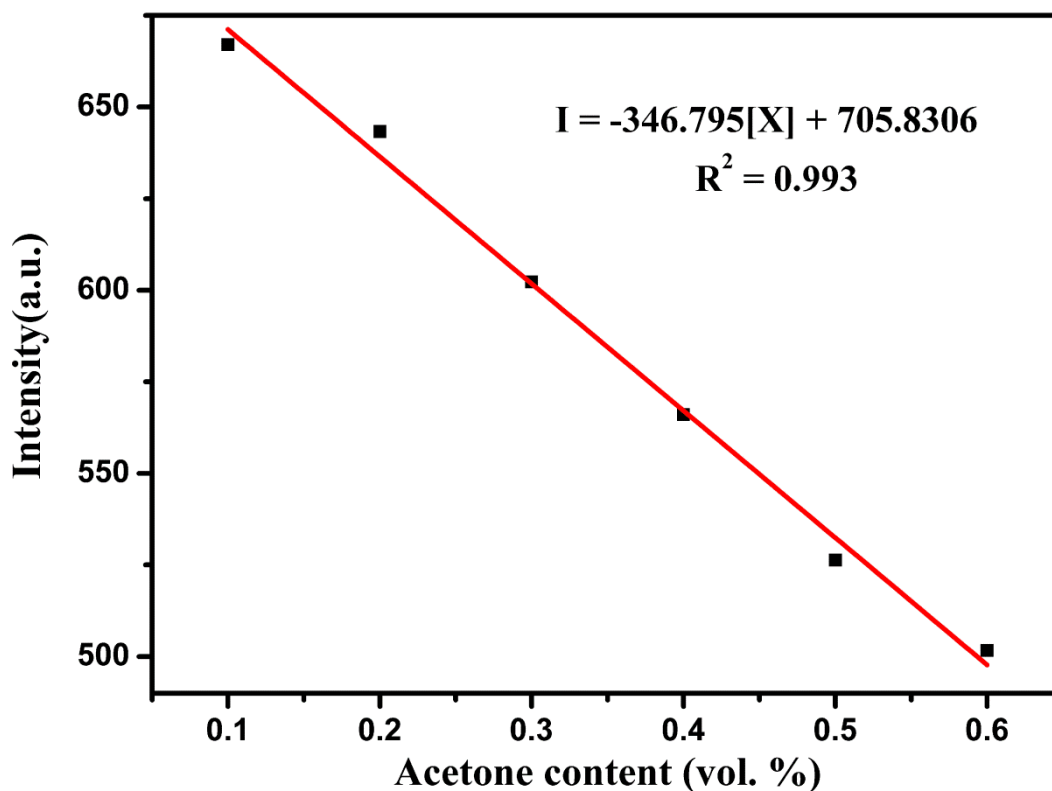

**Fig. S9** Relation of luminescence intensity against acetone added into **1A** suspension and their linear fitting curve for the estimation of LOD.

$$\begin{aligned} \text{Detection Limit} &= 3\sigma/k \\ &= (3 \times 8.1379) / 346.795 \\ &= 0.0704 \text{ vol}\% \end{aligned}$$

Multiple number of luminescence spectra ( $n = 10$ ) were recorded for the blank sample of **1A** suspension. Sample standard deviation  $\sigma$  for the blank probe without the addition of acetone was calculated to be 8.1379.

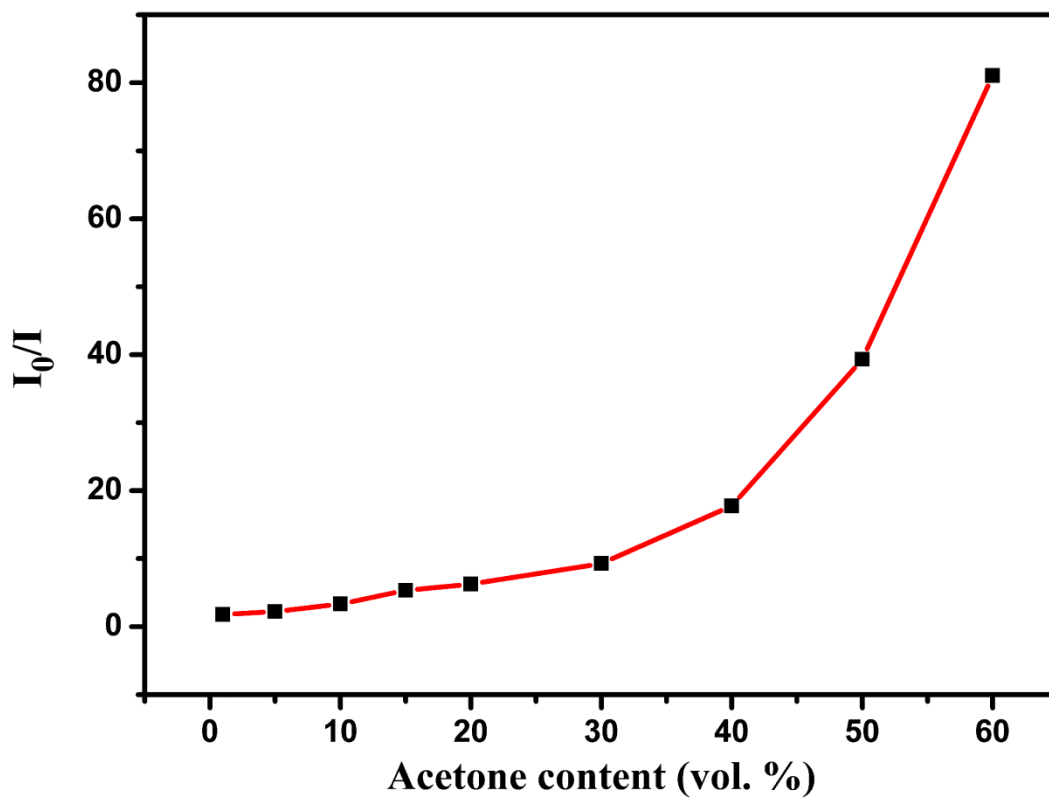

**Fig. S10** Stern–Völmer plot for the luminescence intensities of **1A** in aqueous solutions of different concentrations of acetone.

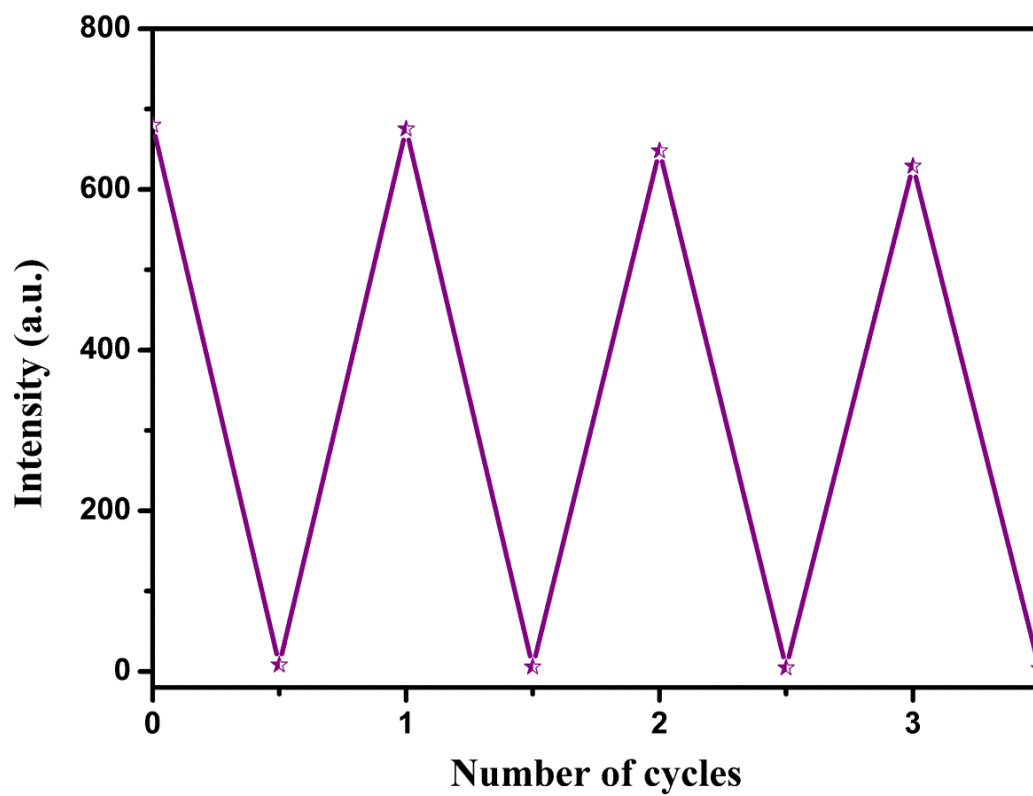

**Fig. S11** Cyclic response of **1A** for detecting acetone (luminescence intensity at 616 nm).

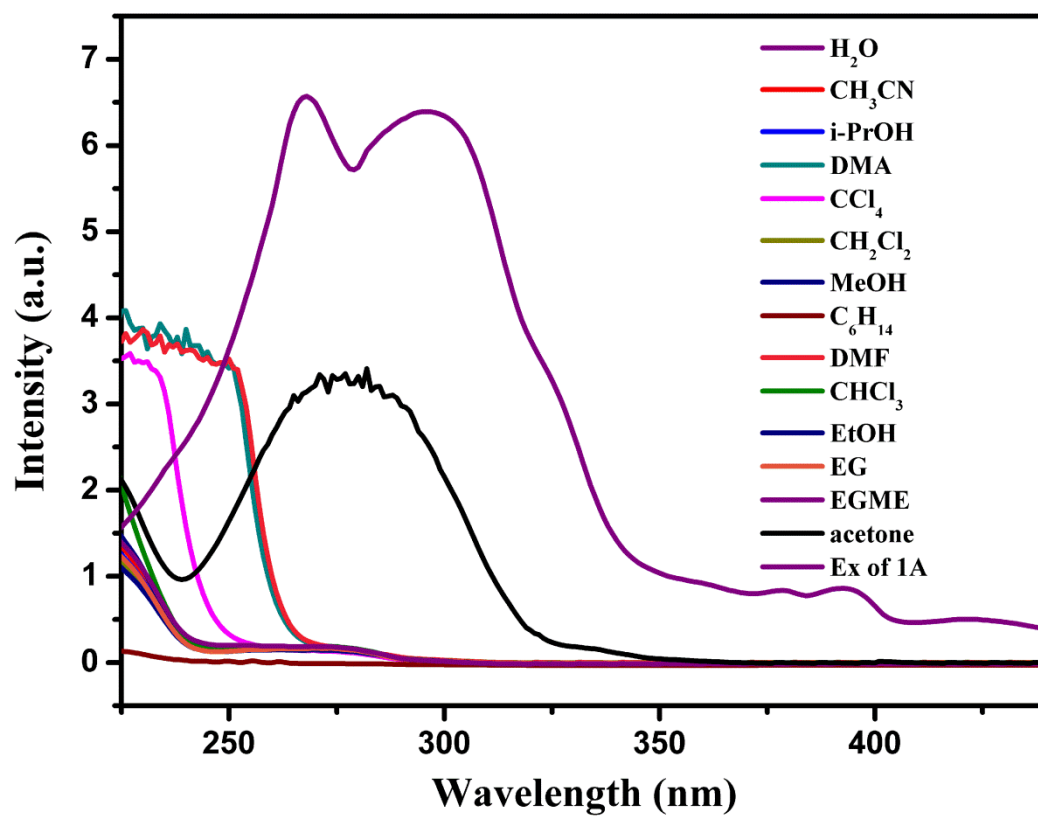

Fig. S12 The absorption spectra of different organic solvents and the excitation spectrum of 1A.



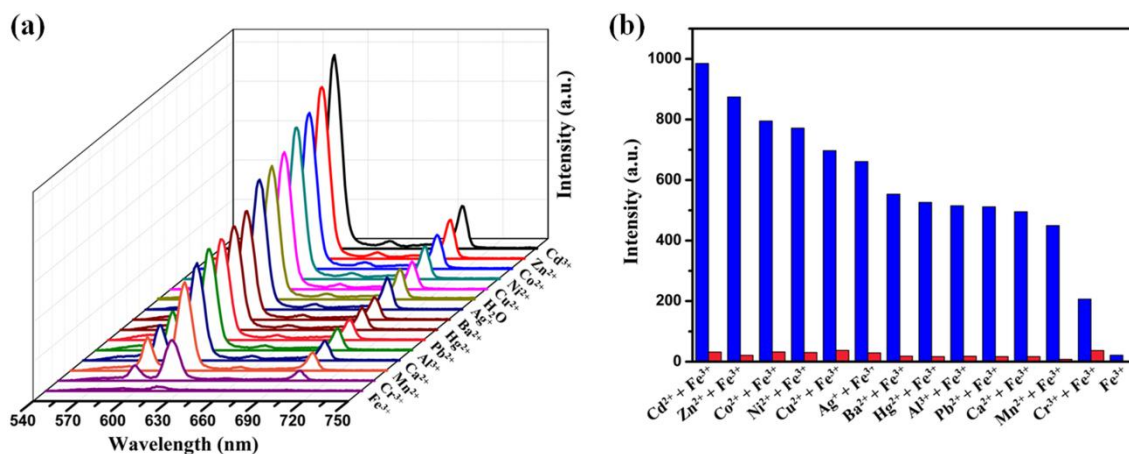

**Fig. S13** (a) Luminescence spectra of **1A** in water treated with different metal ions ( $1 \times 10^{-2}$  mol L $^{-1}$ ). (b) The luminescence intensities of **1A** at 616 nm upon the addition of different metal ions followed by Fe $^{3+}$  ions. The blue bars represent the intensities in different metal ion aqueous solutions, the red bars represent the intensities in the mixed solutions of Fe $^{3+}$  and other metal ions.

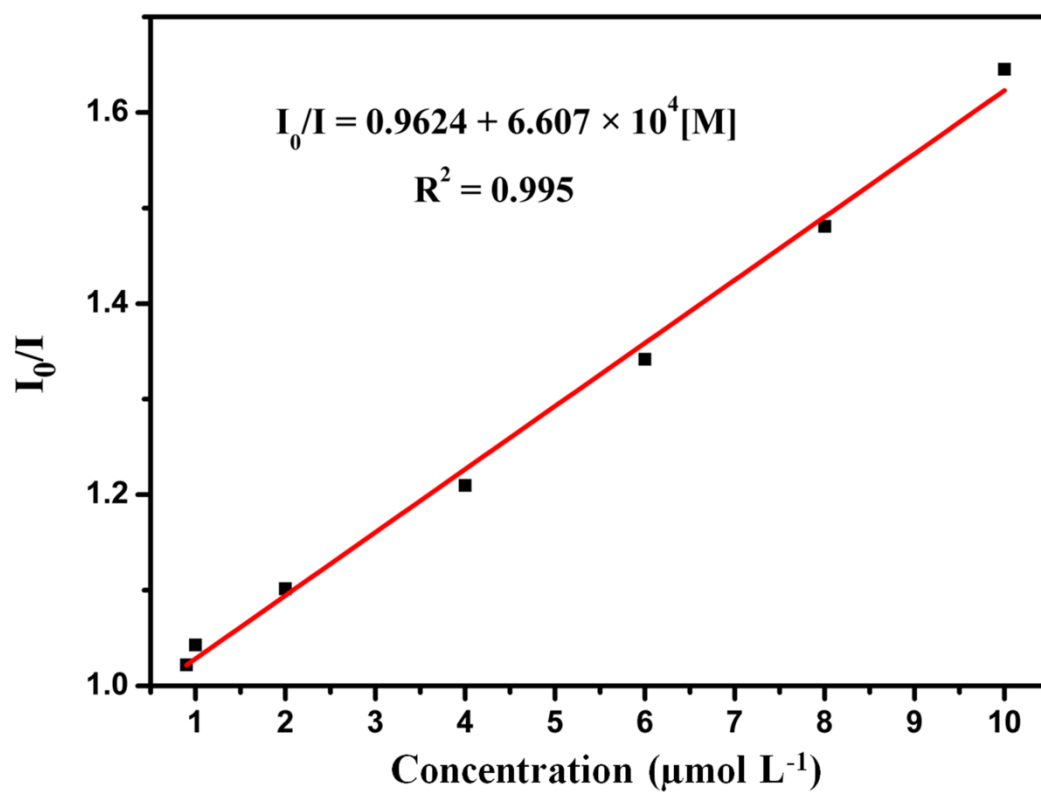

**Fig. S14** The SV quenching curve for **1A** in aqueous solutions of different concentrations of  $\text{Fe}^{3+}$ .

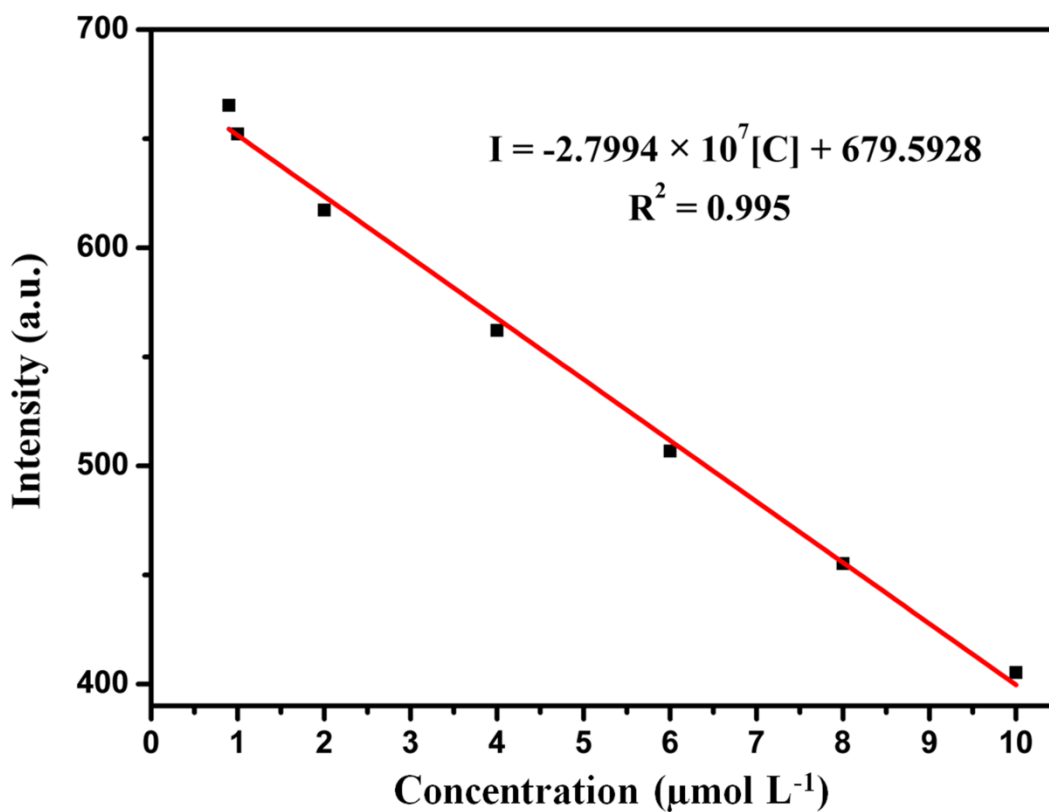

**Fig. S15** Relation of luminescence intensity against  $\text{Fe}^{3+}$  added into **1A** suspension and their linear fitting curve for the estimation of LOD.

$$\text{Detection Limit} = 3\sigma/k$$

$$= (3 \times 8.1379) / 2.7994 \times 10^7 \text{ L mol}^{-1}$$

$$= 0.87 \mu\text{mol L}^{-1}$$

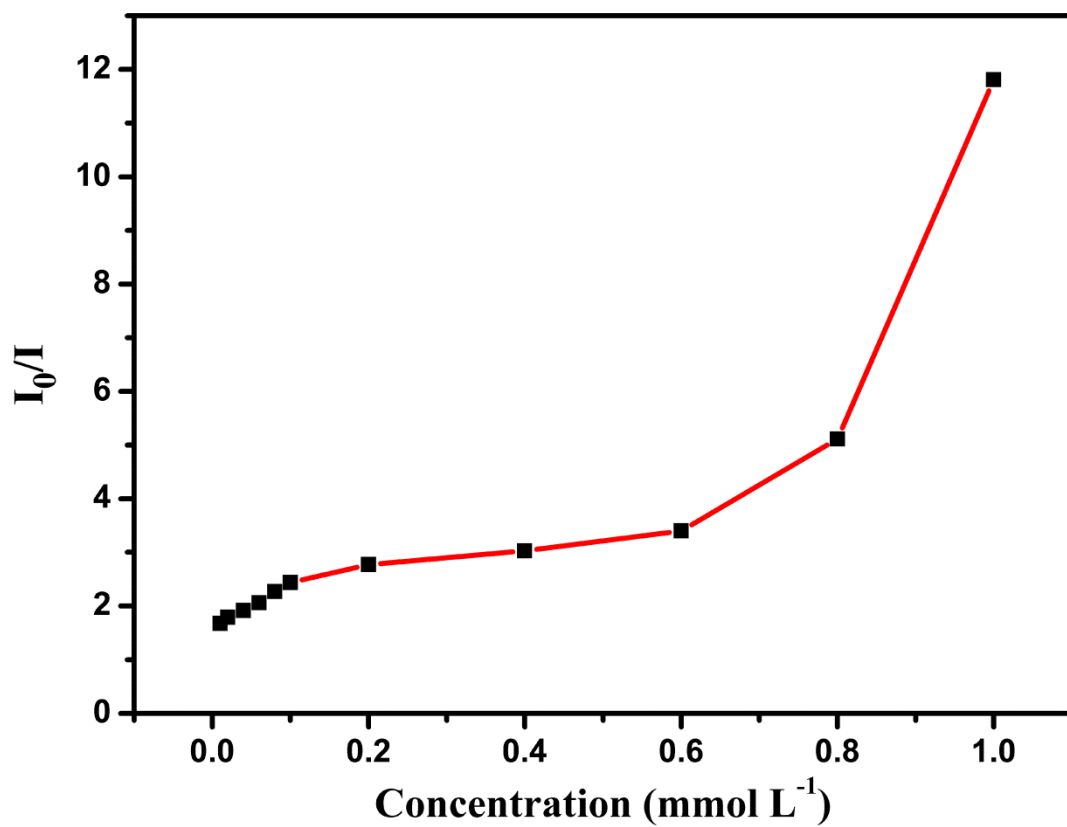

**Fig. S16** Stern–Völmer plot for the luminescence intensities of **1A** in aqueous solutions of different concentrations of  $\text{Fe}^{3+}$ .

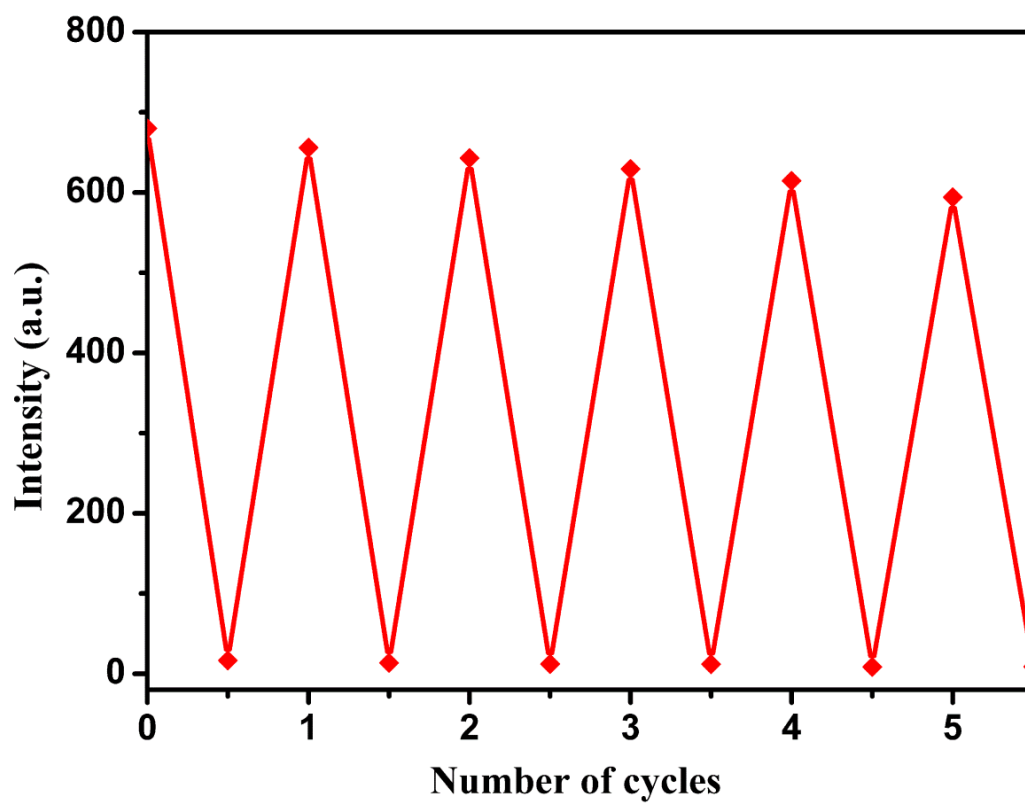

**Fig. S17** Cyclic response of **1A** for detecting  $\text{Fe}^{3+}$  (luminescence intensity at 616 nm).

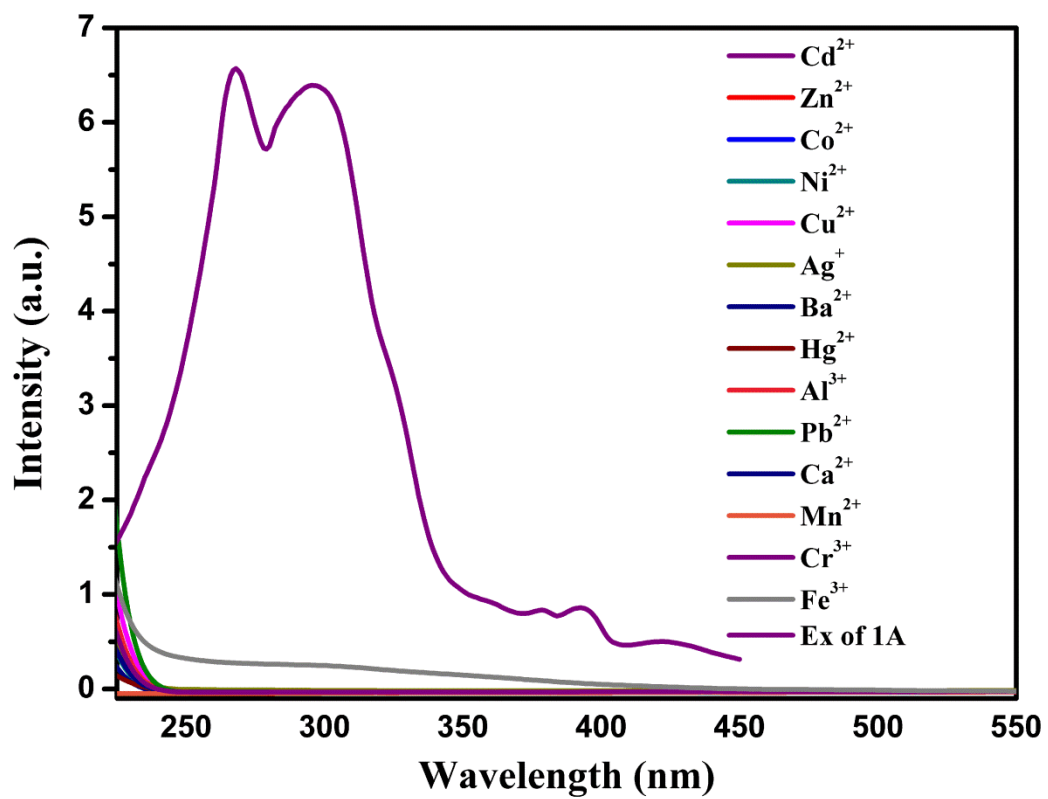

**Fig. S18** The absorption spectra of various cations and the excitation spectrum of **1A**.

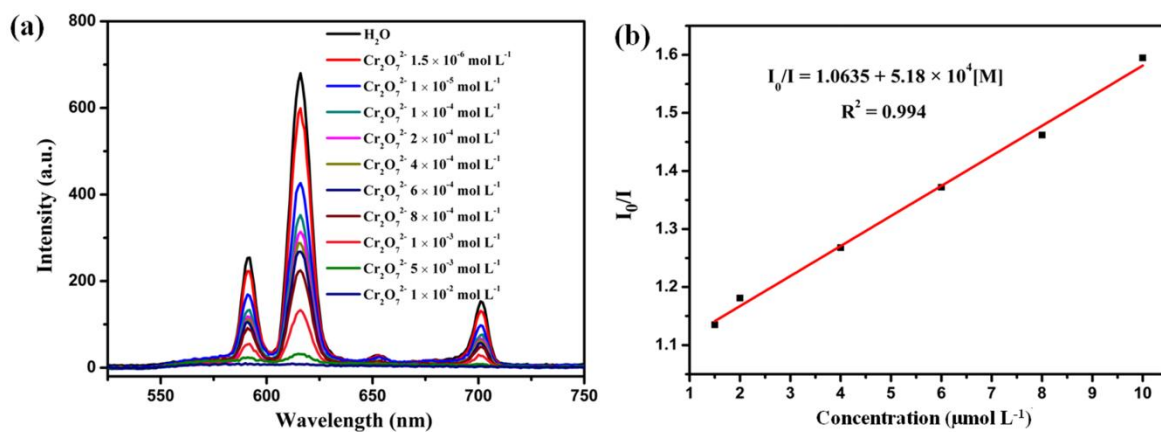

**Fig. S19** (a) Luminescence spectra of **1A** in aqueous solutions containing different concentrations of  $\text{Cr}_2\text{O}_7^{2-}$ . (b) The SV quenching curve for **1A** in aqueous solutions of different concentrations of  $\text{Cr}_2\text{O}_7^{2-}$ .

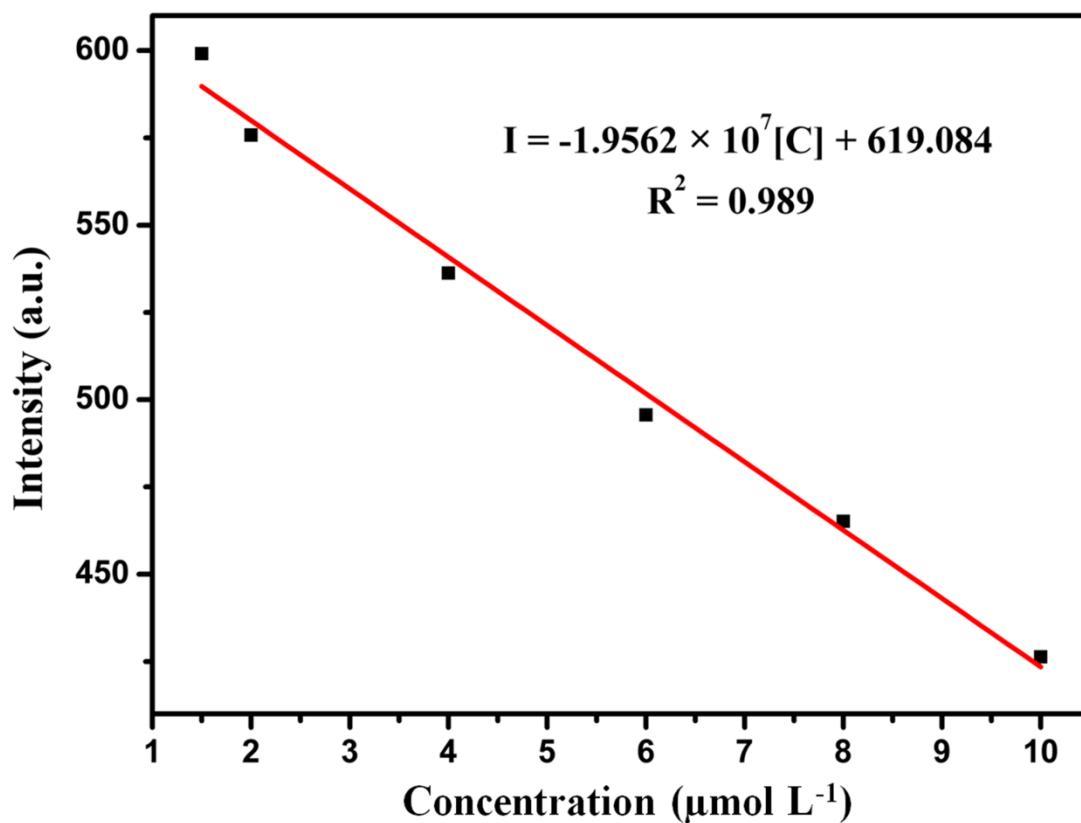

**Fig. S20** Relation of luminescence intensity against  $\text{Cr}_2\text{O}_7^{2-}$  added into **1A** suspension and their linear fitting curve for the estimation of LOD.

$$\text{Detection Limit} = 3\sigma/k$$

$$= (3 \times 8.1379) / 1.9562 \times 10^7 \text{ L mol}^{-1}$$

$$= 1.25 \mu\text{mol L}^{-1}$$



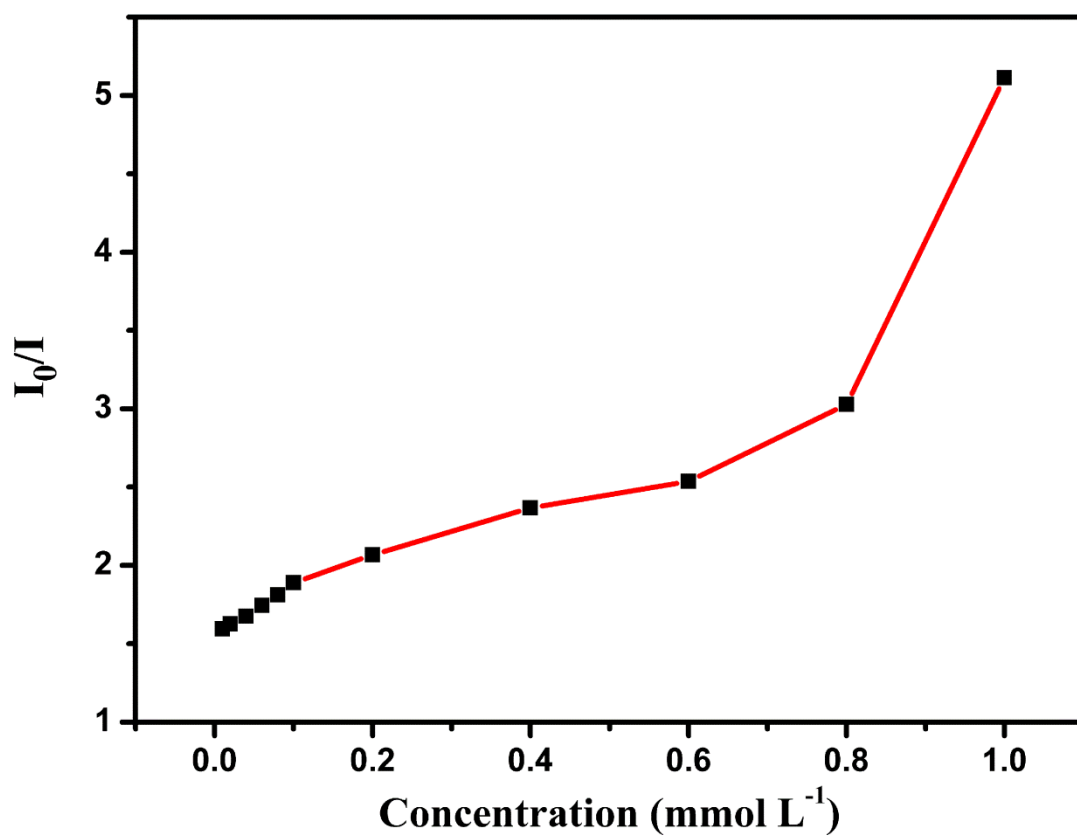

**Fig. S21** Stern–Völmer plot for the luminescence intensities of **1A** in aqueous solutions of different concentrations of  $\text{Cr}_2\text{O}_7^{2-}$ .

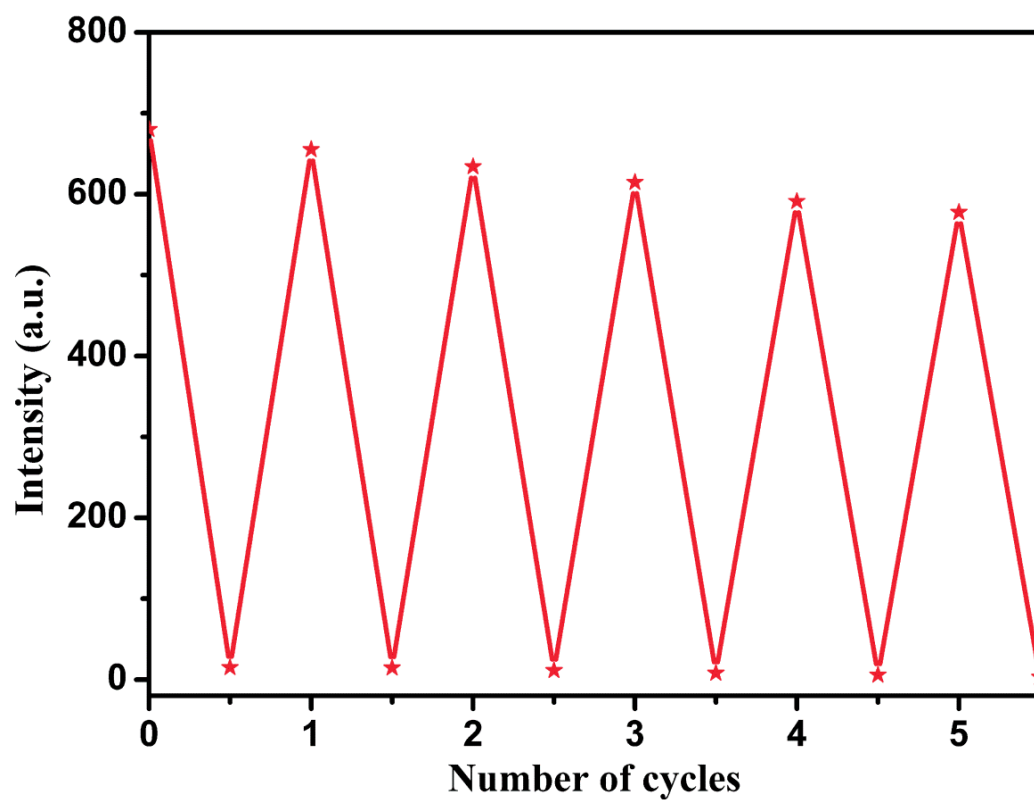

**Fig. S22** Cyclic response of **1A** for detecting  $\text{Cr}_2\text{O}_7^{2-}$  (luminescence intensity at 616 nm).

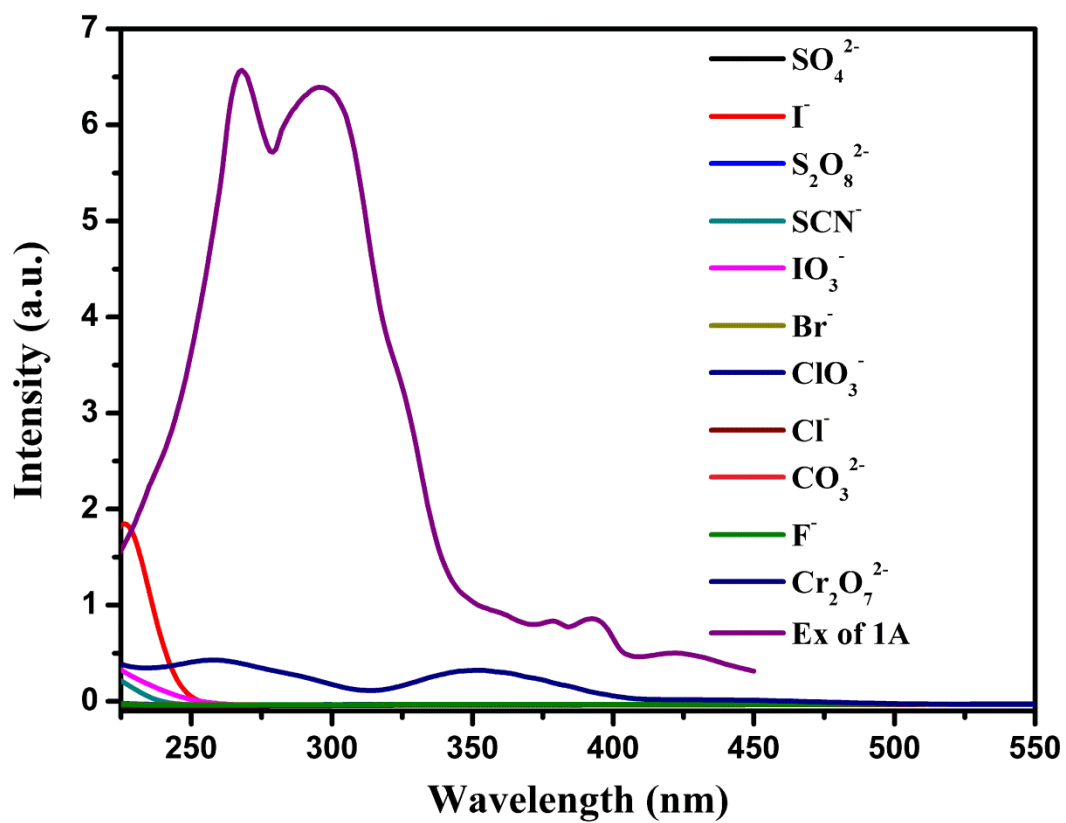

**Fig. S23** The absorption spectra of various anions and the excitation spectrum of 1A.

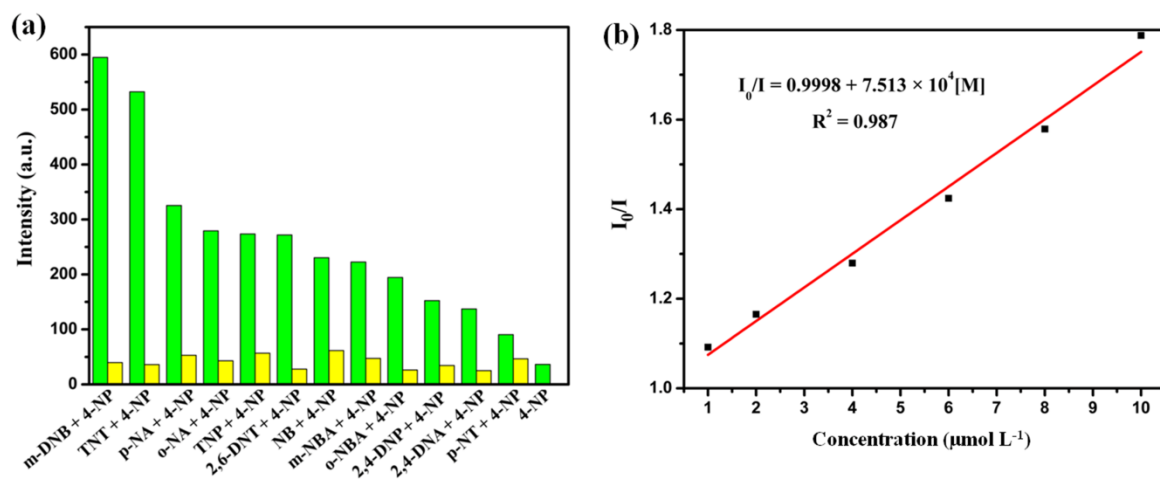

**Fig. S24** (a) The luminescence intensities of **1A** at 616 nm upon the addition of different nitro explosives followed by 4-NP. The green bars represent the intensities in different nitro explosive aqueous solutions, the yellow bars represent the intensities in the mixed solutions of 4-NP and other nitro explosives. (b) The SV quenching curve for **1A** in aqueous solutions of different concentrations of 4-NP.

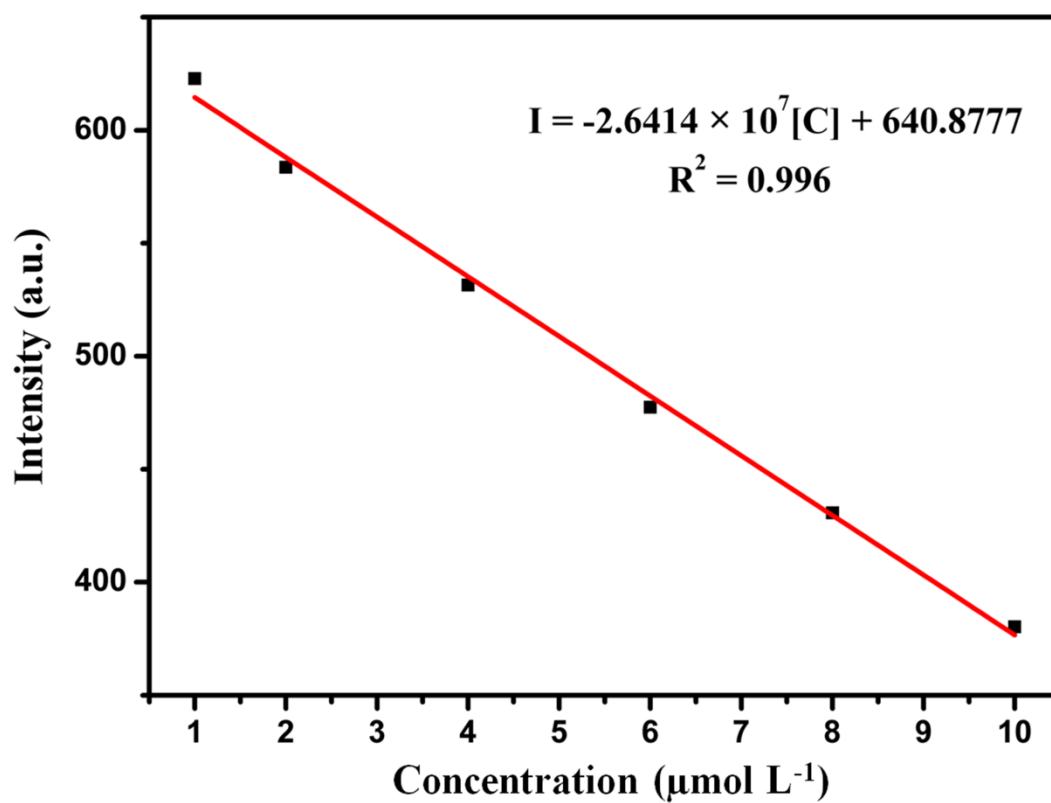

**Fig. S25** Relation of luminescence intensity against 4-NP added into **1A** suspension and their linear fitting curve for the estimation of LOD.

$$\text{Detection Limit} = 3\sigma/k$$

$$= (3 \times 8.1379) / 2.6414 \times 10^7 \text{ L mol}^{-1}$$

$$= 0.92 \mu\text{mol L}^{-1}$$

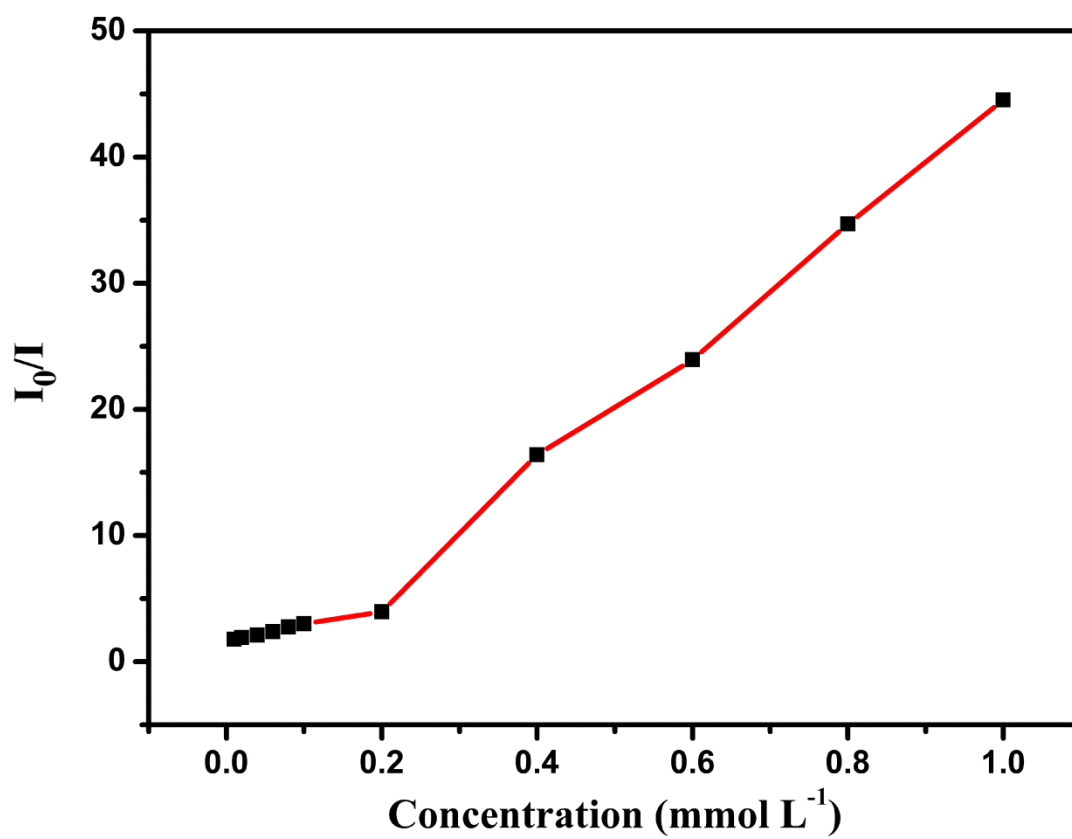

**Fig. S26** Stern–Völmer plot for the luminescence intensities of **1A** in aqueous solutions of different concentrations of 4-NP.

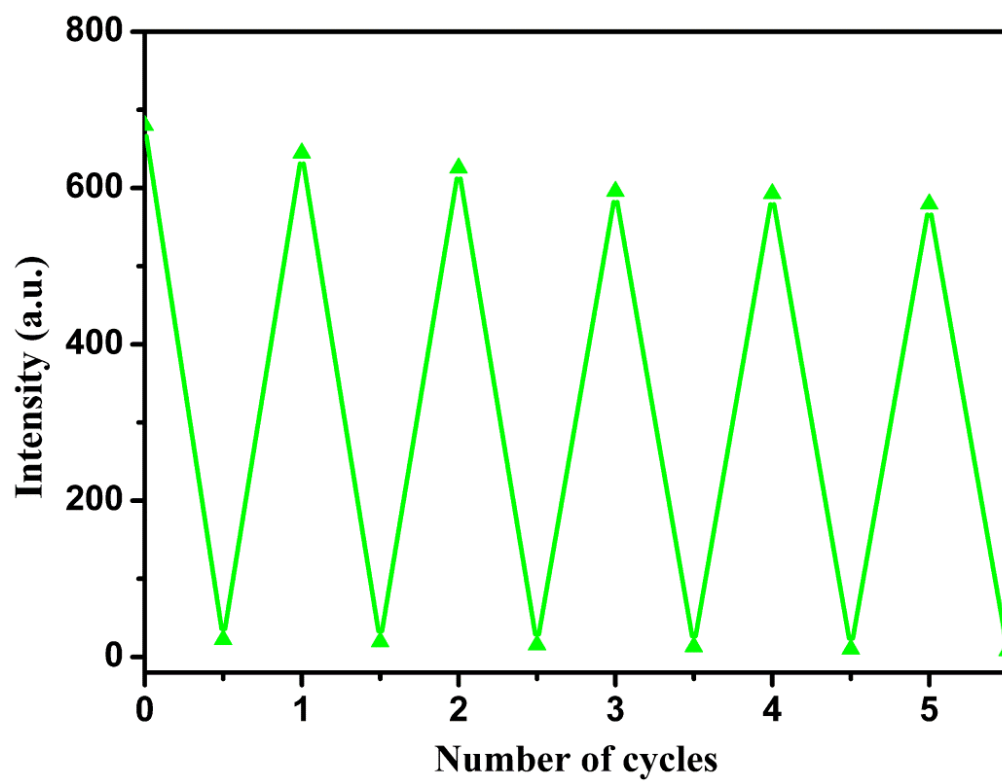

**Fig. S27** Cyclic response of **1A** for detecting 4-NP (luminescence intensity at 616 nm).

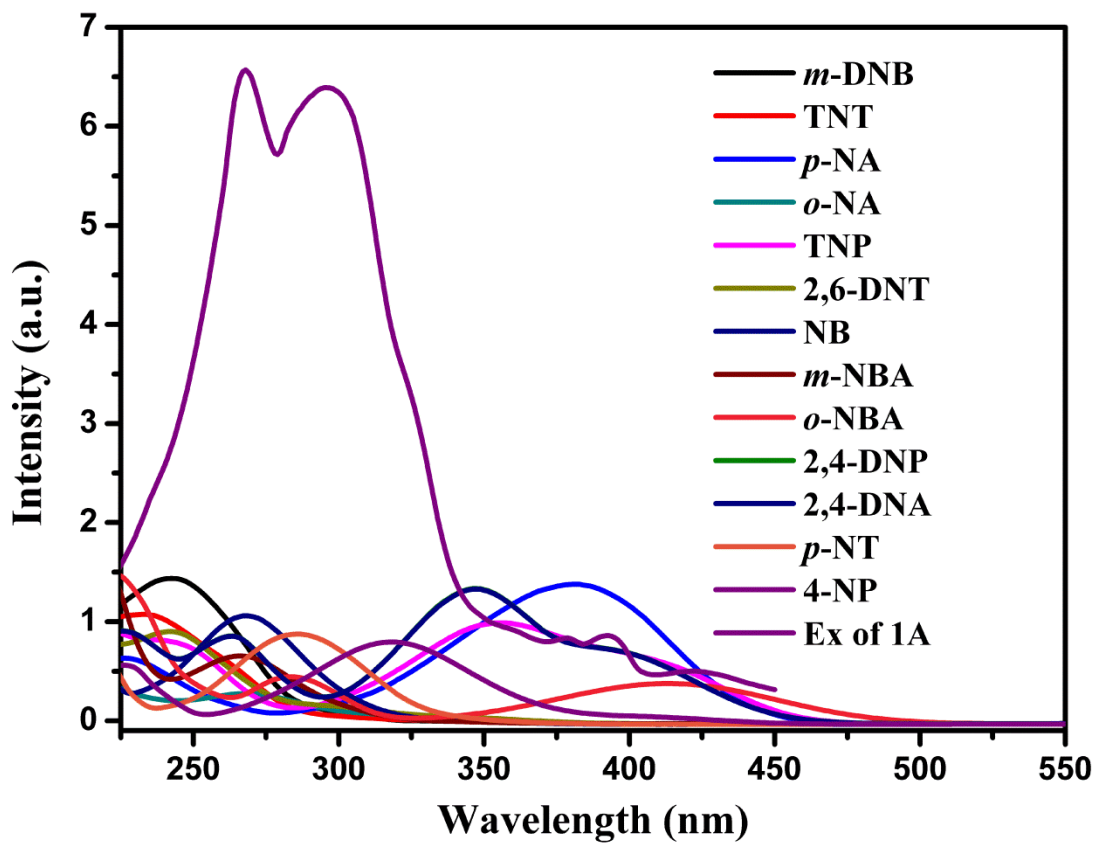

**Fig. S28** The absorption spectra of different nitro explosives and the excitation spectrum of **1A**.



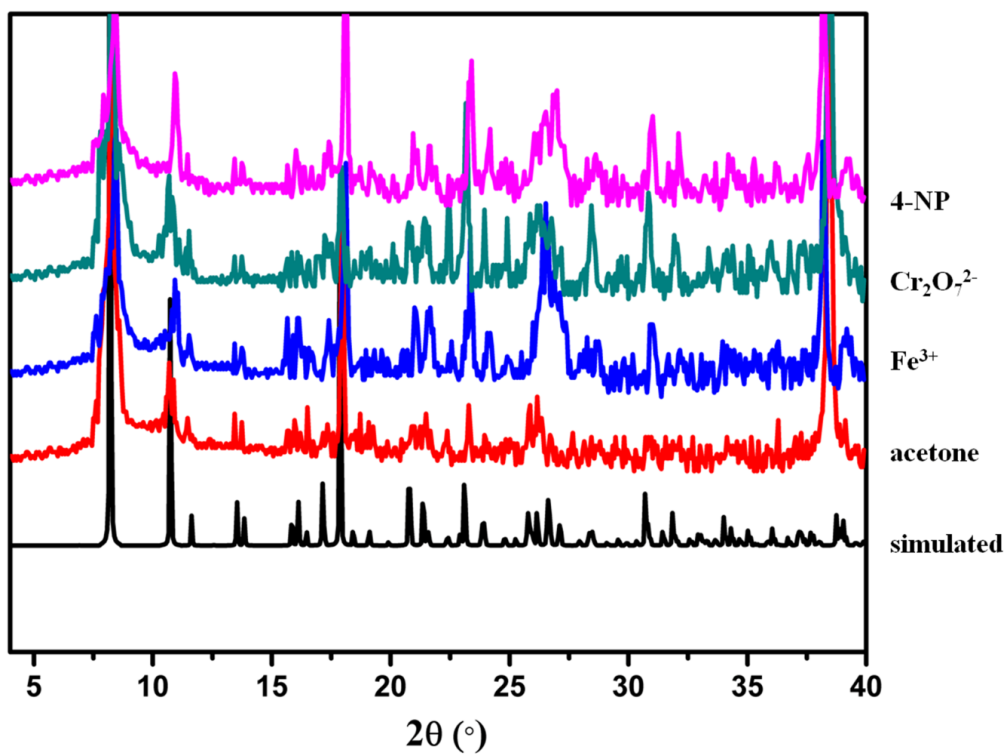

**Fig. S29** The powder X-ray diffraction patterns of **1A** after cyclic sensing acetone,  $\text{Fe}^{3+}$ ,  $\text{Cr}_2\text{O}_7^{2-}$  and 4-NP in aqueous solutions.

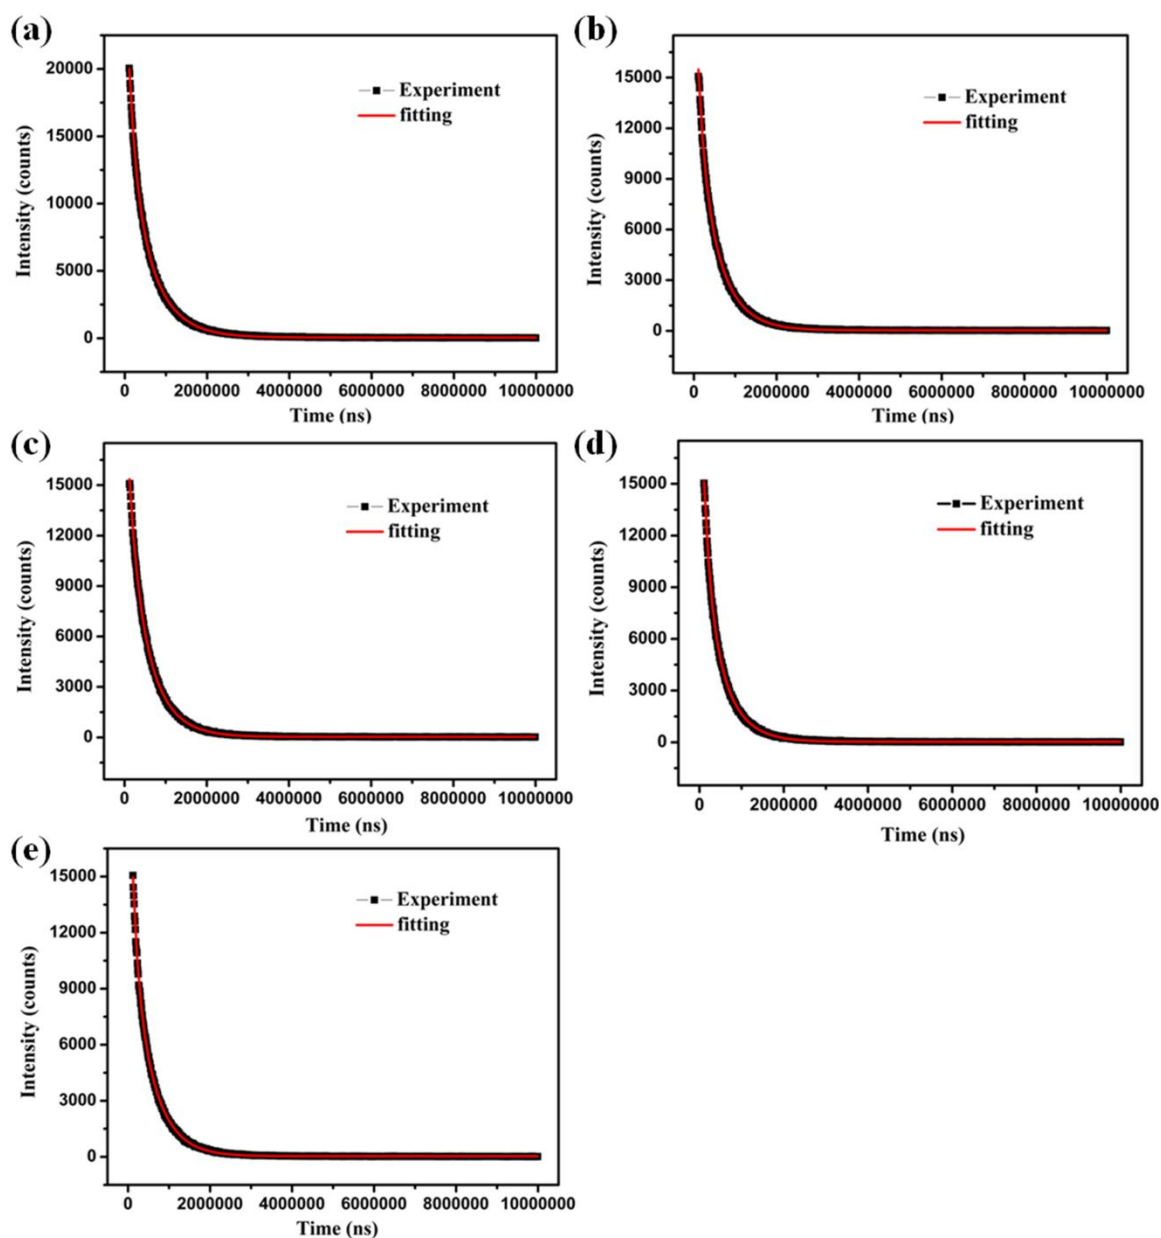

**Fig. S30** Luminescence decay profiles for **1A** (a), acetone@**1A** (b),  $\text{Fe}^{3+}$ @**1A** (c),  $\text{Cr}_2\text{O}_7^{2-}$ @**1A** (d) and 4-NP@**1A** (e) recorded at room temperature. The  $^5\text{D}_0$  decay curve of **1A** with emission was monitored at 614 nm ( $\lambda_{\text{ex}} = 328$  nm). The red line is the best fitting to the data using a double exponential function, giving the value of  $\tau_1 = 0.597$  ms and  $\tau_2 = 0.171$  ms. The  $^5\text{D}_0$  decay curve of acetone@**1A** with emission was monitored at 614 nm ( $\lambda_{\text{ex}} = 328$  nm),  $\tau_1 = 0.142$  ms and  $\tau_2 = 0.522$  ms. The  $^5\text{D}_0$  decay curve of  $\text{Fe}^{3+}$ @**1A** with emission was monitored at 614 nm ( $\lambda_{\text{ex}} = 328$  nm),  $\tau_1 = 0.535$  ms and  $\tau_2 = 0.198$  ms. The  $^5\text{D}_0$  decay curve of  $\text{Cr}_2\text{O}_7^{2-}$ @**1A** with emission was monitored at 614 nm ( $\lambda_{\text{ex}} = 328$  nm),  $\tau_1 = 0.496$  ms and

$\tau_2 = 0.148$  ms. The  ${}^5\text{D}_0$  decay curve of 4-NP@**1A** with emission was monitored at 614 nm ( $\lambda_{\text{ex}} = 328$  nm),  $\tau_1 = 0.122$  ms and  $\tau_2 = 0.509$  ms.

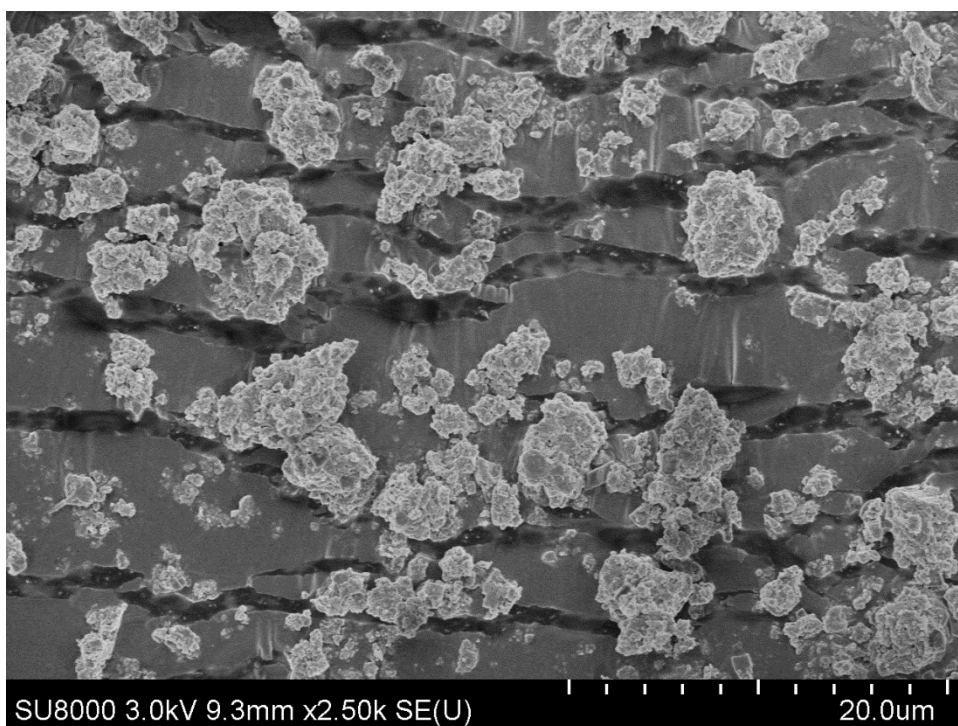

**Fig. S31** SEM image of **1A** after grinding.

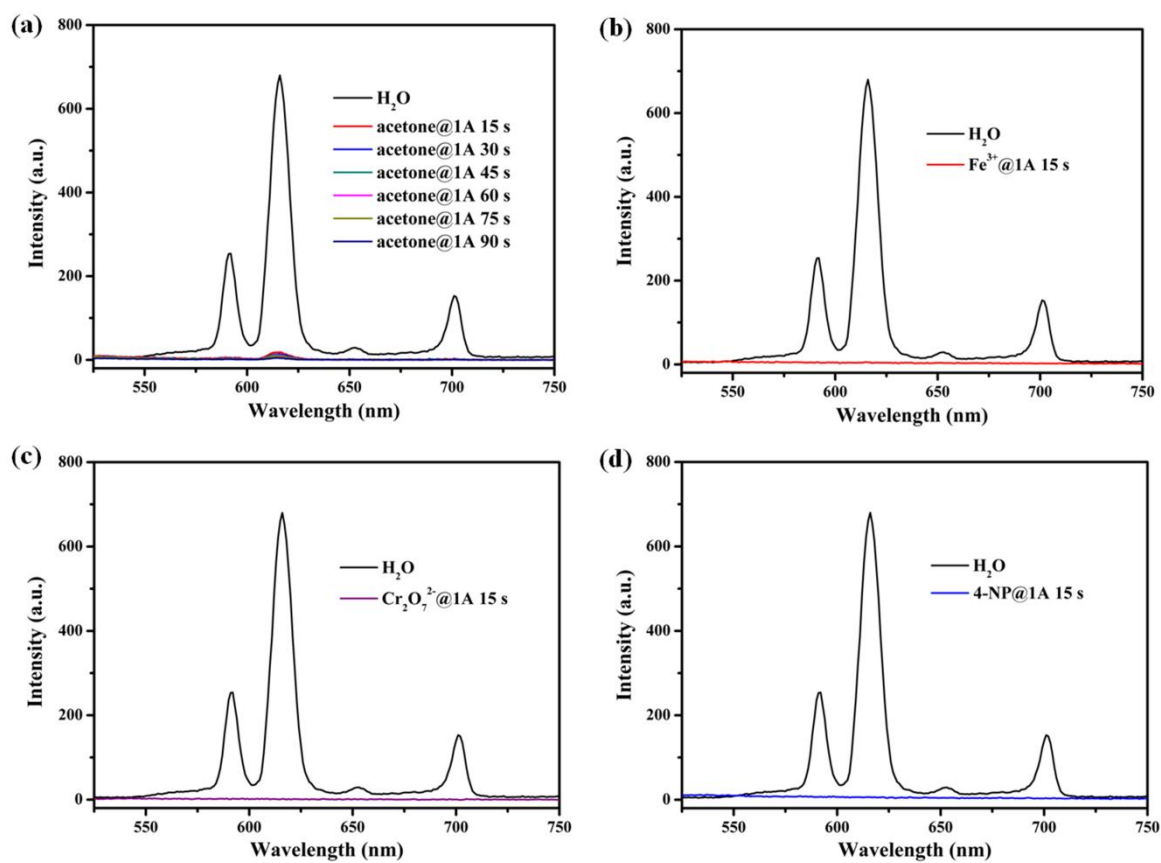

**Fig. S32** Variation of luminescence intensity of **1A** with immersion time in analyte solution of acetone,  $\text{Fe}(\text{NO}_3)_3$  ( $5 \times 10^{-2} \text{ mol L}^{-1}$ ),  $\text{K}_2\text{Cr}_2\text{O}_7^{2-}$  ( $1 \times 10^{-2} \text{ mol L}^{-1}$ ) and 4-NP ( $1 \times 10^{-3} \text{ mol L}^{-1}$ ), respectively.

**Table S1.** Luminescence lifetimes of **1A**, acetone@**1A**, Fe<sup>3+</sup>@**1A**, Cr<sub>2</sub>O<sub>7</sub><sup>2-</sup>@**1A** and 4-NP@**1A**

| Compounds                                                | luminescence lifetimes    |                           |
|----------------------------------------------------------|---------------------------|---------------------------|
|                                                          | (τ <sub>Eu3+</sub> )      |                           |
| <b>1A</b>                                                | τ <sub>1</sub> = 0.597 ms | τ <sub>2</sub> = 0.171 ms |
| acetone@ <b>1A</b>                                       | τ <sub>1</sub> = 0.142 ms | τ <sub>2</sub> = 0.522 ms |
| Fe <sup>3+</sup> @ <b>1A</b>                             | τ <sub>1</sub> = 0.535 ms | τ <sub>2</sub> = 0.198 ms |
| Cr <sub>2</sub> O <sub>7</sub> <sup>2-</sup> @ <b>1A</b> | τ <sub>1</sub> = 0.496 ms | τ <sub>2</sub> = 0.148 ms |
| 4-NP@ <b>1A</b>                                          | τ <sub>1</sub> = 0.122 ms | τ <sub>2</sub> = 0.509 ms |

**Table S2.** Crystal data and structure refinement for **1**

|                                                           | <b>1</b>                                            |
|-----------------------------------------------------------|-----------------------------------------------------|
| Formula                                                   | C <sub>16</sub> H <sub>14</sub> O <sub>9.5</sub> Eu |
| Fw (g mol <sup>-1</sup> )                                 | 528                                                 |
| Crystal system                                            | Tetragonal                                          |
| Space group                                               | <i>I</i> 4 <sub>1</sub> / <i>a</i>                  |
| <i>a</i> (Å)                                              | 21.534(3)                                           |
| <i>c</i> (Å)                                              | 15.908(3)                                           |
| <i>V</i> (Å <sup>3</sup> )                                | 7377(2)                                             |
| <i>Z</i>                                                  | 16                                                  |
| <i>D</i> <sub>Calc.</sub> (g cm <sup>-3</sup> )           | 1.758                                               |
| $\mu$ (mm <sup>-1</sup> )                                 | 3.444                                               |
| <i>F</i> (000)                                            | 3696                                                |
| $\theta$ range (°)                                        | 3.11 - 27.47                                        |
|                                                           | -25 ≤ <i>h</i> ≤ 27                                 |
| Limiting indices                                          | -27 ≤ <i>k</i> ≤ 27                                 |
|                                                           | -20 ≤ <i>l</i> ≤ 20                                 |
| Refl. Collected / unique                                  | 32891 / 4211                                        |
| <i>R</i> <sub>int</sub>                                   | 0.0412                                              |
| Data / restraints / parameters                            | 4211 / 0 / 226                                      |
| GOF                                                       | 1.074                                               |
| <i>R</i> <sub><i>I</i></sub> [ <i>I</i> > 2σ( <i>I</i> )] | 0.0611                                              |
| <i>wR</i> <sub>2</sub> [ <i>I</i> > 2σ( <i>I</i> )]       | 0.1910                                              |
| <i>R</i> <sub><i>I</i></sub> (all data)                   | 0.0657                                              |

---

|                                                    |                  |
|----------------------------------------------------|------------------|
| $wR_2$ (all data)                                  | 0.1927           |
| Largest diff.peak and hole( $e \text{ \AA}^{-3}$ ) | 7.109 and -0.762 |
| CCDC No.                                           | 1845244          |

---



**Table S3.** Selected bond lengths [ $\text{\AA}$ ] and angles [ $^\circ$ ] for **1**.

|                     |          |                     |           |
|---------------------|----------|---------------------|-----------|
| Eu(1)-O(8)#1        | 2.323(8) | Eu(1)-O(2)          | 2.461(10) |
| Eu(1)-O(6)#2        | 2.322(7) | O(3)-Eu(1)#5        | 2.359(7)  |
| Eu(1)-O(7)#3        | 2.324(7) | O(5)-Eu(1)#6        | 2.331(7)  |
| Eu(1)-O(5)#4        | 2.331(7) | O(6)-Eu(1)#7        | 2.322(7)  |
| Eu(1)-O(1)          | 2.347(6) | O(7)-Eu(1)#8        | 2.324(7)  |
| Eu(1)-O(3)#5        | 2.359(7) | O(8)-Eu(1)#9        | 2.323(8)  |
| O(8)#1-Eu(1)-O(6)#2 | 91.4(3)  | O(8)#1-Eu(1)-O(7)#3 | 71.8(3)   |
| O(6)#2-Eu(1)-O(7)#3 | 91.8(3)  | O(8)#1-Eu(1)-O(5)#4 | 71.7(3)   |
| O(6)#2-Eu(1)-O(5)#4 | 98.9(3)  | O(7)#3-Eu(1)-O(5)#4 | 142.1(3)  |
| O(8)#1-Eu(1)-O(1)   | 105.4(3) | O(6)#2-Eu(1)-O(1)   | 162.6(3)  |
| O(7)#3-Eu(1)-O(1)   | 89.4(3)  | O(5)#4-Eu(1)-O(1)   | 90.6(3)   |
| O(8)#1-Eu(1)-O(3)#5 | 147.3(3) | O(6)#2-Eu(1)-O(3)#5 | 87.9(3)   |
| O(7)#3-Eu(1)-O(3)#5 | 140.9(3) | O(5)#4-Eu(1)-O(3)#5 | 76.2(3)   |
| O(1)-Eu(1)-O(3)#5   | 80.3(3)  | O(8)#1-Eu(1)-O(2)   | 140.5(4)  |
| O(6)#2-Eu(1)-O(2)   | 84.4(4)  | O(7)#3-Eu(1)-O(2)   | 69.1(4)   |
| O(5)#4-Eu(1)-O(2)   | 147.8(4) | O(1)-Eu(1)-O(2)     | 79.8(4)   |
| O(3)#5-Eu(1)-O(2)   | 71.9(4)  | C(3)-O(1)-Eu(1)     | 122.3(6)  |
| C(1)-O(3)-Eu(1)#5   | 141.6(7) | C(3)-O(5)-Eu(1)#6   | 165.1(7)  |
| C(12)-O(6)-Eu(1)#7  | 131.9(7) | C(1)-O(7)-Eu(1)#8   | 158.7(7)  |
| C(12)-O(8)-Eu(1)#9  | 163.9(8) |                     |           |

Symmetry transformations used to generate equivalent atoms:

#1  $y-3/4, -x+5/4, z-3/4$ ; #2  $x, y, z-1$ ; #3  $-y+3/4, x+3/4, -z+3/4$ ; #4  $-y+5/4, x+3/4, z-1/4$ ; #5  $-x+1/2, -y+3/2, -z+1/2$ ; #6  $y-3/4, -x+5/4, z+1/4$ ; #7  $x, y, z+1$ ; #8  $y-3/4, -x+3/4, -z+3/4$ ; #9  $-y+5/4, x+3/4, z+3/4$ .

**Table S4.** The comparison of  $K_{SV}$  between **1A** and other reported luminescent sensors for the detection of acetone.

| MOFs                                                                                                                        | $K_{SV}$ | Detection limits<br>(vol%) | Reference |
|-----------------------------------------------------------------------------------------------------------------------------|----------|----------------------------|-----------|
| [Eu(L)(H <sub>2</sub> O)] · 2.5H <sub>2</sub> O                                                                             | 0.7019   | 0.0704                     | This work |
| [Eu(BTB)(H <sub>2</sub> O) <sub>2</sub> solvent] <sub>n</sub>                                                               | 42.6     | 0.3                        | 22        |
| [Cd(Tipb)(pta) <sub>0.5</sub> (H <sub>2</sub> O)-<br>(NO <sub>3</sub> )] (DMF) <sub>x</sub> (H <sub>2</sub> O) <sub>y</sub> | -        | 0.084                      | [1]       |
| [Cd(Tipb)(mta)] (DMF) <sub>x</sub> (H <sub>2</sub> O) <sub>y</sub>                                                          | -        | 0.075                      | [1]       |
| Cd <sub>3</sub> (L)(H <sub>2</sub> O) <sub>2</sub> (DMF) <sub>2</sub> · 5DMF                                                | -        | 0.1                        | [2]       |
| Cd <sub>3</sub> (L)(dib) · 3H <sub>2</sub> O · 5DMA                                                                         | -        | 0.1                        | [2]       |
| Eu(BTC)(H <sub>2</sub> O) · 1.5H <sub>2</sub> O                                                                             | -        | 0.3                        | [3]       |
| Tb(BTC)(H <sub>2</sub> O) <sub>6</sub>                                                                                      | -        | 0.3                        | [4]       |

**Table S5.** The comparison of  $K_{SV}$  between **1A** and other reported luminescent sensors for the detection of  $\text{Fe}^{3+}$  ions.

| MOFs                                                                                                 | $K_{SV}$ ( $\text{L mol}^{-1}$ ) | Detection limits<br>( $\mu\text{mol L}^{-1}$ ) | Reference |
|------------------------------------------------------------------------------------------------------|----------------------------------|------------------------------------------------|-----------|
| $[\text{Eu}(\text{L})(\text{H}_2\text{O})] \cdot 2.5\text{H}_2\text{O}$                              | $6.607 \times 10^4$              | 0.87                                           | This work |
| $[\text{Zn}(\text{H}_2\text{bptc})(2,2'\text{-bipy})(\text{H}_2\text{O})] \cdot 3\text{H}_2\text{O}$ | $2.581 \times 10^4$              | 9.5                                            | [5]       |
| $[\text{Zn}_2(\text{bptc})(\text{H}_2\text{O})] \cdot (4,4'\text{-bipy})_{0.5}$                      | $2.826 \times 10^4$              | 8.5                                            | [5]       |
| $\{[\text{Eu}_2\text{L}_{1.5}(\text{H}_2\text{O})_2\text{EtOH}] \cdot \text{DMF}\}_n$                | $2.94 \times 10^3$               | 10                                             | [6]       |
| $\text{EuL}_3$                                                                                       | $4.1 \times 10^3$                | -                                              | [7]       |
| 534-MOF-Tb                                                                                           | $5.51 \times 10^3$               | -                                              | [8]       |
| $\text{Pb}_3\text{O}_2\text{L}$                                                                      | $7.80 \times 10^3$               | 7.85                                           | 4a        |
| $\{[\text{Cd}(\text{L})\text{-(BPDC)}] \cdot 2\text{H}_2\text{O}\}_n$                                | $3.64 \times 10^4$               | 2.21                                           | [9]       |
| $\{[\text{Cd}(\text{L})(\text{SDBA})(\text{H}_2\text{O})] \cdot 0.5\text{H}_2\text{O}\}_n$           | $3.59 \times 10^4$               | 7.14                                           | [9]       |

**Table S6.** The comparison of  $K_{SV}$  between **1A** and other reported luminescent sensors for the detection of  $\text{Cr}_2\text{O}_7^{2-}$  ions.

| MOFs                                                                                              | $K_{SV}$ ( $\text{L mol}^{-1}$ ) | Detection limits<br>( $\mu\text{mol L}^{-1}$ ) | Reference |
|---------------------------------------------------------------------------------------------------|----------------------------------|------------------------------------------------|-----------|
| $[\text{Eu}(\text{L})(\text{H}_2\text{O})] \cdot 2.5\text{H}_2\text{O}$                           | $5.18 \times 10^4$               | 1.25                                           | This work |
| $\{[\text{Tb}(\text{TATAB})(\text{H}_2\text{O})_2] \cdot \text{NMP} \cdot \text{H}_2\text{O}\}_n$ | $1.11 \times 10^4$               | 5                                              | 41        |
| $[\text{Eu}_2(\text{tpbpc})_4 \cdot \text{CO}_3 \cdot 4\text{H}_2\text{O}]$ DMF solvent           | $1.04 \times 10^4$               | 3.64                                           | 3a        |
| $\{[\text{Eu}_2\text{L}_{1.5}(\text{H}_2\text{O})_2\text{EtOH}] \cdot \text{DMF}\}_n$             | $1.526 \times 10^3$              | 10                                             | [6]       |
| $\text{Eu}^{3+}$ @MIL-121                                                                         | $4.34 \times 10^3$               | -                                              | [10]      |
| 534-MOF-Tb                                                                                        | $1.37 \times 10^4$               | 140                                            | [8]       |
| $[\text{Zn}_2(\text{TPOM})(\text{NH}_2\text{-BDC})_2] \cdot 4\text{H}_2\text{O}$                  | $7.59 \times 10^3$               | 3.9                                            | [11]      |
| $\{[\text{Cd}(\text{L})\text{-}(\text{BPDC})] \cdot 2\text{H}_2\text{O}\}_n$                      | $6.4 \times 10^3$                | 37.6                                           | [9]       |
| $\{[\text{Cd}(\text{L})(\text{SDBA})(\text{H}_2\text{O})] \cdot 0.5\text{H}_2\text{O}\}_n$        | $4.96 \times 10^3$               | 48.6                                           | [9]       |

**Table S7.** The comparison of  $K_{SV}$  between **1A** and other reported luminescent sensors for the detection of 4-NP.

| MOFs                                                                                                                    | $K_{SV}$ (L mol <sup>-1</sup> ) | Detection limits<br>( $\mu\text{mol L}^{-1}$ ) | Reference |
|-------------------------------------------------------------------------------------------------------------------------|---------------------------------|------------------------------------------------|-----------|
| [Eu(L)(H <sub>2</sub> O)] · 2.5H <sub>2</sub> O                                                                         | $7.513 \times 10^4$             | 0.92                                           | This work |
| Pb <sub>3</sub> O <sub>2</sub> L                                                                                        | $3.31 \times 10^3$              | 2.16                                           | 4a        |
| Zn-MOF-1                                                                                                                | $1.25 \times 10^4$              | 3.74                                           | [12]      |
| [Zn <sub>2</sub> (TPOM)(NH <sub>2</sub> -BDC) <sub>2</sub> ] · 4H <sub>2</sub> O                                        | $2.17 \times 10^4$              | 3.5                                            | [11]      |
| [Gd <sub>6</sub> (L) <sub>3</sub> (HL) <sub>2</sub> (H <sub>2</sub> O) <sub>10</sub> ] · 18H <sub>2</sub> O x(solvent)  | $8.4 \times 10^3$               | 12                                             | [13]      |
| [Eu <sub>6</sub> (L) <sub>3</sub> (HL) <sub>2</sub> ·(H <sub>2</sub> O) <sub>10</sub> ] · 10H <sub>2</sub> O x(solvent) | -                               | 1.7                                            | [14]      |

## References

- [1] Y. Li, H. Song, Q. Chen, K. Liu, F.-Y. Zhao, W.-J. Ruan and Z. Chang, *J. Mater. Chem. A*, 2014, **2**, 9469–9473.
- [2] F.-Y. Yi, W.-T. Yang and Z.-M. Sun, *J. Mater. Chem.*, 2012, **22**, 23201–23209.
- [3] B. Chen, Y. Yang, F. Zapata, G. Lin, G. Qian and E. B. Lobkovsky, *Adv. Mater.*, 2007, **19**, 1693–1696.
- [4] W. T. Yang, J. Feng and H. J. Zhang, *J. Mater. Chem.*, 2012, **22**, 6819–6823.
- [5] J. Sun, P. Zhang, H. Qi, J. Jia, X. D. Chen, S. B. Jing, L. Wang and Y. Fan, *Inorganica Chimica Acta*, 2018, **469**, 298–305.
- [6] W. Liu, X. Huang, C. Xu, C. Y. Chen, L. Z. Yang, W. Dou, W. M. Chen, H. Yang and W. S. Liu, *Chem. – Eur. J.*, 2016, **22**, 18769–18776.
- [7] M. Zheng, H. Q. Tan, Z. G. Xie, L. G. Zhang, X. B. Jing and Z. C. Sun, *ACS Appl. Mater. Interfaces*, 2013, **5**, 1078–1083.
- [8] M. Chen, W.-M. Xu, J.-Y. Tian, H. Cui, J.-X. Zhang, C.-S. Liu and M. Du, *J. Mater. Chem. C*, 2017, **5**, 2015–2021.
- [9] S. G. Chen, Z. Z. Shi, L. Qin, H. L. Jia and H. G. Zheng, *Cryst. Growth Des.*, 2017, **17**, 67–72.
- [10] J.-N. Hao and B. Yan, *New J. Chem.*, 2016, **40**, 4654–4661.
- [11] R. Lv, J. Y. Wang, Y. P. Zhang, H. Li, L. Y. Yang, S. Y. Liao, W. Gu and X. Liu, *J. Mater. Chem. A*, 2016, **4**, 15494–15500.
- [12] X.-Y. Guo, F. Zhao, J.-J. Liu, Z.-L. Liu and Y.-Q. Wang, *J. Mater. Chem. A*, 2017, **5**, 20035–20043.
- [13] Q.-H. Tan, Y.-Q. Wang, X.-Y. Guo, H.-T. Liu and Z.-L. Liu, *RSC Adv.*, 2016, **6**, 61725–61731.

[14] Y.-Q. Wang, Q.-H. Tan, H.-T. Liu, W. Sun and Z.-L. Liu, *RSC Adv.*, 2015, **5**, 86614–86619.
